# Supplementary material for: Bioactivity and Metabolome Mining of Deep-Sea Sediment-Derived Microorganisms Reveal New Hybrid PKS-NRPS Macrolactone from Aspergillus versicolor PS108-62
Source: MDPI journal article supplement (doi:10.3390/md21020095), 2023-01-28
Supplement: s1 [file s1]

## Bioactivity and metabolome mining of deep-sea sediment derived microorganisms reveal new hybrid PKS-NRPS macrolactone from *Aspergillus versicolor* PS108-62

Florent Magot <sup>1</sup>, Gwendoline Van Soen <sup>1</sup>, Larissa Buedenbender <sup>1,2</sup>, Fengjie Li <sup>1</sup>, Thomas Soltwedel <sup>3</sup>, Laura Grauso <sup>4</sup>, Alfonso Mangoni <sup>5</sup>, Martina Blümel <sup>1</sup> and Deniz Tasdemir <sup>1,6\*</sup>

<sup>1</sup> GEOMAR Centre for Marine Biotechnology (GEOMAR-Biotech), Research Unit Marine Natural Products Chemistry, GEOMAR Helmholtz Centre for Ocean Research Kiel, Am Kiel-Kanal 44, 24106 Kiel, Germany

<sup>2</sup> Current address: CICA - Interdisciplinary Centre for Chemistry and Biology, University of A Coruña, 15071 A Coruña, Spain

<sup>3</sup> Alfred Wegener Institute, Helmholtz Centre for Polar and Marine Research, Am Handelshafen 12, 27570 Bremerhaven, Germany

<sup>4</sup> Dipartimento di Agraria, Università degli Studi di Napoli Federico II, via Università 100, 80055 Portici (NA), Italy

<sup>5</sup> Dipartimento di Farmacia, Università degli Studi di Napoli Federico II, via Domenico Montesano 49, 80131 Napoli, Italy

<sup>6</sup> Faculty of Mathematics and Natural Sciences, Kiel University, Christian-Albrechts-Platz 4, 24118 Kiel, Germany

\* Correspondence: dtasdemir@geomar.de; Tel.: +49-431-600-4430

## Supplementary Tables

- Table S1.** Taxonomic classification of 70 bacteria and 7 fungi derived from Arctic deep-sea sediment.
- Table S2.** In vitro activity of the crude extracts of the six selected fungi grown in four media.
- Table S3.** In vitro activity of the crude extracts of 32 selected bacteria grown on four media.
- Table S4.** Manual dereplication of the main peaks from the UPLC-MS/MS chromatogram of the GYM and GYM+Br media extracts of *B. licheniformis* PS108-67a.
- Table S5.** Dereplication of the main peaks from the UPLC-MS/MS chromatogram of the GPY+Br, PDA and rice media extracts of *A. versicolor* PS108-62.
- Table S6.** Results of DFT-NMR studies of model compounds **1m**
- Table S7.** Predicted NMR chemical shift and DP4+ analysis for diastereomeric model compounds **1m**.
- Table S8.** Results of DFT-NMR studies of compounds **1** and tris-*epi*-**1**.
- Table S9.** Predicted NMR chemical shift and DP4+ analysis for compounds **1** and tris-*epi*-**1**.
- Table S10.** Comparison of the 1D NMR data of **3** and (+)-versicomide A (both in CD<sub>3</sub>OD)

## Supplementary Figures

- Figure S1.** Structures of lichenysins annotated from the GYM and GYM+Br media extracts of *Bacillus licheniformis* PS108-67a.
- Figure S2.** MS/MS spectrum of lichenysin G8a (C<sub>54</sub>H<sub>97</sub>N<sub>8</sub>O<sub>12</sub> *m/z* 1049.7234 [M+H]<sup>+</sup>).
- Figure S3.** MS/MS spectrum of lichenysin G13 (C<sub>51</sub>H<sub>91</sub>N<sub>8</sub>O<sub>12</sub> *m/z* 1007.6754 [M+H]<sup>+</sup>).
- Figure S4.** MS/MS spectrum of lichenysin G14 (C<sub>52</sub>H<sub>93</sub>N<sub>8</sub>O<sub>12</sub> *m/z* 1021.691 [M+H]<sup>+</sup>).
- Figure S5.** MS/MS spectrum of lichenysin G15 (C<sub>53</sub>H<sub>95</sub>N<sub>8</sub>O<sub>12</sub> *m/z* 1035.707 [M+H]<sup>+</sup>).
- Figure S6.** Structures of the compounds annotated from the GPY+Br, PDA and rice media extracts and SPE fractions of the strain *A. versicolor* PS108-62.
- Figure S7.** MS/MS spectrum of cyclopenol (C<sub>17</sub>H<sub>15</sub>N<sub>2</sub>O<sub>4</sub> *m/z* 311.1033 [M+H]<sup>+</sup>).
- Figure S8.** MS/MS spectrum of (iso)versicomide A (C<sub>19</sub>H<sub>26</sub>N<sub>3</sub>O<sub>3</sub> *m/z* 344.1975 [M+H]<sup>+</sup>).
- Figure S9.** MS/MS spectrum of versicomide B (C<sub>19</sub>H<sub>24</sub>N<sub>3</sub>O<sub>3</sub> *m/z* 342.1818 [M+H]<sup>+</sup>).
- Figure S10.** MS/MS spectrum of versicomide D (C<sub>19</sub>H<sub>26</sub>N<sub>3</sub>O<sub>4</sub> *m/z* 360.1923 [M+H]<sup>+</sup>).
- Figure S11.** MS/MS spectrum of burnettramycin A (C<sub>41</sub>H<sub>72</sub>N<sub>2</sub>O<sub>12</sub> *m/z* 770.5042 [M+H]<sup>+</sup>).
- Figure S12.** MS/MS spectrum of cerebroside derivative (C<sub>43</sub>H<sub>79</sub>N<sub>2</sub>O<sub>9</sub> *m/z* 776.5644 [M+Na]<sup>+</sup>).
- Figure S13.** MS/MS spectrum of protubonine A (C<sub>19</sub>H<sub>24</sub>N<sub>3</sub>O<sub>4</sub> *m/z* 358.1768 [M+H]<sup>+</sup>).
- Figure S14.** <sup>1</sup>H NMR spectrum of the Kh subextract of *A. versicolor* PS108-62 (CDCl<sub>3</sub>, 500 MHz).
- Figure S15.** HR-ESIMS data of versicolide A (**1**).
- Figure S16.** MS/MS spectrum of versicolide A (**1**).
- Figure S17.** FT-IR spectrum of versicolide A (**1**).
- Figure S18.** <sup>1</sup>H NMR spectrum of versicolide A (**1**) (MeOD, 600 MHz).
- Figure S19.** <sup>13</sup>C NMR spectrum of versicolide A (**1**) (MeOD, 150 MHz).
- Figure S20.** DEPT-HSQC spectrum of versicolide A (**1**) (MeOD, 600/150 MHz).
- Figure S21.** <sup>1</sup>H-<sup>1</sup>H COSY NMR spectrum of versicolide A (**1**) (MeOD, 600 MHz).
- Figure S22.** HMBC spectrum of versicolide A (**1**) (MeOD, 600/150 MHz).
- Figure S23.** NOESY spectrum of versicolide A (**1**) (MeOD, 600MHz).
- Figure S24.** <sup>1</sup>H NMR spectrum of (-)-isoversicomide A (**3**) (MeOD, 600 MHz).
- Figure S25.** <sup>13</sup>C NMR spectrum of (-)-isoversicomide A (**3**) (MeOD, 150 MHz).
- Figure S26.** <sup>1</sup>H-<sup>1</sup>H COSY NMR spectrum of (-)-isoversicomide A (**3**) (MeOD, 600 MHz).
- Figure S27.** DEPT-HSQC spectrum of (-)-isoversicomide A (**3**) (MeOD, 600/150 MHz).
- Figure S28.** HMBC spectrum of (-)-isoversicomide A (**3**) (MeOD, 600/150 MHz).
- Figure S29.** NOESY spectrum of (-)-isoversicomide A (**3**) (MeOD, 600 MHz).
- Figure S30.** Detailed analysis of (+)-versicomide A drawn by Pan et al. [10] for its amino acid constituents.

## Supplementary References

**Table S1.** Taxonomic classification of 70 bacteria and 7 fungi derived from Arctic deep-sea sediment. Identification was based on the 16S rRNA gene for bacteria and ITS1-2 region for fungi. Sequences were compared to the NCBI GenBank using nucleotide BLAST (<https://www.ncbi.nlm.nih.gov/genbank/> accessed November 2018). Representative strains selected for initial bioactivity screening are highlighted in blue.

| Isolate name | Isolation medium | Amplicon | Length (bp) | Accession number | Closest related species NCBI GenBank (sequence similarity) [accession number]                                                               | Taxonomic classification |
|--------------|------------------|----------|-------------|------------------|---------------------------------------------------------------------------------------------------------------------------------------------|--------------------------|
| PS108-08     | TSB3             | 16S      | 524         | OP808238         | <i>Bacillus simplex</i> (100%) [CP017704.1]<br><i>Bacillus simplex</i> (100%) [NR_114919.1]<br><i>Bacillus simplex</i> (100%) [NR_112726.1] | <i>Bacillus simplex</i>  |
| PS108-10     | TSB3             | 16S      | 308         | OP808239         | <i>Bacillus simplex</i> (99%) [CP017704.1]<br><i>Bacillus simplex</i> (99%) [NR_114919.1]<br><i>Bacillus simplex</i> (99%) [NR_112726.1]    | <i>Bacillus simplex</i>  |
| PS108-16     | TSB3             | 16S      | 527         | OP808240         | <i>Bacillus simplex</i> (99%) [CP017704.1]<br><i>Bacillus simplex</i> (99%) [NR_114919.1]<br><i>Bacillus simplex</i> (99%) [NR_112726.1]    | <i>Bacillus simplex</i>  |
| PS108-18     | TSB3             | 16S      | 458         | OP808241         | <i>Bacillus simplex</i> (100%) [CP017704.1]<br><i>Bacillus simplex</i> (100%) [NR_114919.1]<br><i>Bacillus simplex</i> (100%) [NR_112726.1] | <i>Bacillus simplex</i>  |
| PS108-27     | TSB3             | 16S      | 632         | OP808242         | <i>Bacillus simplex</i> (100%) [CP017704.1]<br><i>Bacillus simplex</i> (100%) [NR_114919.1]<br><i>Bacillus simplex</i> (100%) [NR_112726.1] | <i>Bacillus simplex</i>  |
| PS108-36a    | TSB3             | 16S      | 662         | OP808243         | <i>Bacillus simplex</i> (99%) [CP017704.1]<br><i>Bacillus simplex</i> (99%) [NR_114919.1]<br><i>Bacillus simplex</i> (99%) [NR_112726.1]    | <i>Bacillus simplex</i>  |
| PS108-38     | TSB3             | 16S      | 1087        | OP808244         | <i>Bacillus muralis</i> (100%) [NR_042083.1]<br><i>Bacillus simplex</i> (99%) [CP017704.1]<br><i>Bacillus simplex</i> (99%) [NR_114919.1]   | <i>Bacillus</i> sp.      |
| PS108-39     | TSB3             | 16S      | 1094        | OP808245         | <i>Bacillus simplex</i> (99%) [CP017704.1]<br><i>Bacillus simplex</i> (99%) [NR_114919.1]<br><i>Bacillus simplex</i> (99%) [NR_112726.1]    | <i>Bacillus simplex</i>  |
| PS108-40     | TSB3             | 16S      | 565         | OP808246         | <i>Bacillus simplex</i> (99%) [CP017704.1]<br><i>Bacillus simplex</i> (99%) [NR_114919.1]<br><i>Bacillus simplex</i> (99%) [NR_112726.1]    | <i>Bacillus simplex</i>  |

|           |      |     |      |          |                                                                                                                                                                             |                                     |
|-----------|------|-----|------|----------|-----------------------------------------------------------------------------------------------------------------------------------------------------------------------------|-------------------------------------|
| PS108-46  | TSB3 | 16S | 610  | OP808247 | <i>Bacillus simplex</i> (100%) [CP017704.1]<br><i>Bacillus simplex</i> (100%) [NR_114919.1]<br><i>Bacillus simplex</i> (100%) [NR_112726.1]                                 | <i>Bacillus simplex</i>             |
| PS108-48a | TSB3 | 16S | 873  | OP808248 | <i>Bacillus muralis</i> (100%) [NR_042083.1]<br><i>Bacillus simplex</i> (99%) [CP017704.1]<br><i>Bacillus simplex</i> (99%) [NR_114919.1]                                   | <i>Bacillus</i> sp.                 |
| PS108-51  | MB   | 16S | 582  | OP808249 | <i>Bacillus simplex</i> (100%) [CP017704.1]<br><i>Bacillus simplex</i> (100%) [NR_114919.1]<br><i>Bacillus simplex</i> (100%) [NR_112726.1]                                 | <i>Bacillus simplex</i>             |
| PS108-56  | MB   | 16S | 585  | OP808250 | <i>Bacillus simplex</i> (99%) [CP017704.1]<br><i>Bacillus simplex</i> (99%) [NR_114919.1]<br><i>Bacillus simplex</i> (99%) [NR_112726.1]                                    | <i>Bacillus simplex</i>             |
| PS108-63  | MB   | 16S | 554  | OP808251 | <i>Bacillus simplex</i> (100%) [CP017704.1]<br><i>Bacillus simplex</i> (100%) [NR_114919.1]<br><i>Bacillus simplex</i> (100%) [NR_112726.1]                                 | <i>Bacillus simplex</i>             |
| PS108-64b | MB   | 16S | 373  | OP808252 | <i>Bacillus simplex</i> (100%) [CP017704.1]<br><i>Bacillus simplex</i> (100%) [NR_114919.1]<br><i>Bacillus simplex</i> (100%) [NR_112726.1]                                 | <i>Bacillus simplex</i>             |
| PS108-69  | MB   | 16S | 514  | OP808253 | <i>Bacillus simplex</i> (99%) [CP017704.1]<br><i>Bacillus simplex</i> (99%) [NR_114919.1]<br><i>Bacillus simplex</i> (99%) [NR_112726.1]                                    | <i>Bacillus simplex</i>             |
| PS108-83  | MB   | 16S | 537  | OP808254 | <i>Peribacillus frigiditolerans</i> (100%) [MW578406.1]<br><i>Peribacillus frigiditolerans</i> (99%) [OL824805.1]<br><i>Peribacillus castrilensis</i> (99%) [OL61per9301.1] | <i>Peribacillus frigiditolerans</i> |
| PS108-87a | MB   | 16S | 463  | OP808255 | <i>Bacillus simplex</i> (100%) [CP017704.1]<br><i>Bacillus simplex</i> (100%) [NR_114919.1]<br><i>Bacillus simplex</i> (100%) [NR_112726.1]                                 | <i>Bacillus simplex</i>             |
| PS108-87b | MB   | 16S | 1026 | OP808256 | <i>Bacillus simplex</i> (100%) [CP017704.1]<br><i>Brevibacterium frigiditolerans</i> (100%) [NR_117474.1]<br><i>Bacillus simplex</i> (100%) [NR_114919.1]                   | <i>Bacillus simplex</i>             |
| PS108-25  | TSB3 | 16S | 622  | OP808257 | <i>Bacillus pumilis</i> (100%) [LT906438.1]<br><i>Bacillus pumilis</i> (100%) [KX261622.1]<br><i>Bacillus pumilis</i> (100%) [NR_112637.1]                                  | <i>Bacillus pumilis</i>             |

|           |      |     |      |          |                                                                                                                                                                 |                               |
|-----------|------|-----|------|----------|-----------------------------------------------------------------------------------------------------------------------------------------------------------------|-------------------------------|
| PS108-26  | TSB3 | 16S | 666  | OP808258 | <i>Bacillus xiamenensis</i> (100%) [NR_148244.1]<br><i>Bacillus xiamenensis</i> (100%) [JX680066.1]<br><i>Bacillus aerius</i> (100%) [NR_118439.1]              | <i>Bacillus</i> sp.           |
| PS108-32  | TSB3 | 16S | 607  | OP808259 | <i>Bacillus pumilis</i> (100%) [LT906438.1]<br><i>Bacillus pumilis</i> (100%) [KX261622.1]<br><i>Bacillus pumilis</i> (100%) [NR_112637.1]                      | <i>Bacillus pumilis</i>       |
| PS108-42  | TSB3 | 16S | 637  | OP808260 | <i>Bacillus pumilis</i> (99%) [LT906438.1]<br><i>Bacillus pumilis</i> (99%) [KX261622.1]<br><i>Bacillus pumilis</i> (99%) [NR_112637.1]                         | <i>Bacillus pumilis</i>       |
| PS108-53  | MB   | 16S | 465  | OP808261 | <i>Bacillus zhangzhouensis</i> (100%) [NR_148786.1]<br><i>Bacillus zhangzhouensis</i> (100%) [JX680133.1]<br><i>Bacillus pumilus</i> (99%) [LT906438.1]         | <i>Bacillus</i> sp.           |
| PS108-57  | MB   | 16S | 634  | OP808262 | <i>Bacillus xiamenensis</i> (100%) [NR_148244.1]<br><i>Bacillus xiamenensis</i> (100%) [JX680066.1]<br><i>Bacillus aerius</i> (100%) [NR_118439.1]              | <i>Bacillus</i> sp.           |
| PS108-33  | TSB  | 16S | 419  | OP808263 | <i>Bacillus mycoides</i> (100%) [CP009692.1]<br><i>Bacillus mycoides</i> (100%) [NR_113990.1]<br><i>Bacillus mycoides</i> (100%) [AM747229.1]                   | <i>Bacillus mycoides</i>      |
| PS108-68  | MB   | 16S | 636  | OP808264 | <i>Bacillus mycoides</i> (100%) [CP009692.1]<br><i>Bacillus mycoides</i> (100%) [NR_113990.1]<br><i>Bacillus mycoides</i> (100%) [AM747229.1]                   | <i>Bacillus mycoides</i>      |
| PS108-67a | MB   | 16S | 417  | OP808265 | <i>Bacillus licheniformis</i> (100%) [MF461332.1]<br><i>Bacillus sonorensis</i> (100%) [MF446619.1]<br><i>Bacillus paralicheniformis</i> (100%) [KY694465.1]    | <i>Bacillus licheniformis</i> |
| PS108-67b | MB   | 16S | 1199 | OP808266 | <i>Bacillus licheniformis</i> (100%) [MF461332.1]<br><i>Bacillus licheniformis</i> (100%) [KY034375.1]<br><i>Bacillus paralicheniformis</i> (100%) [KY694465.1] | <i>Bacillus licheniformis</i> |
| PS108-54  | MB   | 16S | 512  | OP808267 | <i>Bacillus hwajinpoensis</i> (100%) [NR_025264.1]<br><i>Bacillus hemicentroti</i> (99%) [NR_109010.1]<br><i>Bacillus algicola</i> (99%) [NR_029077.1]          | <i>Bacillus hwajinpoensis</i> |
| PS108-95  | MB   | 16S | 472  | OP808268 | <i>Bacillus hwajinpoensis</i> (100%) [NR_025264.1]<br><i>Bacillus hemicentroti</i> (99%) [NR_109010.1]<br><i>Bacillus algicola</i> (99%) [NR_029077.1]          | <i>Bacillus hwajinpoensis</i> |

|          |      |     |      |          |                                                                                                                                                                        |                            |
|----------|------|-----|------|----------|------------------------------------------------------------------------------------------------------------------------------------------------------------------------|----------------------------|
| PS108-70 | MB   | 16S | 368  | OP808269 | <i>Bacillus hemicentroti</i> (99%) [NR_109010.1]<br><i>Bacillus hwajinpoensis</i> (99%) [NR_025264.1]                                                                  | <i>Bacillus</i> sp.        |
| PS108-93 | MB   | 16S | 512  | OP808270 | <i>Bacillus hwajinpoensis</i> (100%) [NR_025264.1]<br><i>Bacillus hemicentroti</i> (99%) [NR_109010.1]<br><i>Bacillus algicola</i> (99%) [NR_029077.1]                 | <i>Bacillus</i> sp.        |
| PS108-37 | TSB3 | 16S | 648  | OP808271 | <i>Bacillus muralis</i> (100%) [NR_042083.1]<br><i>Brevibacterium frigoritolerans</i> (99%) [NR_117474.1]<br><i>Brevibacterium frigoritolerans</i> (99%) [NR_115064.1] | <i>Bacillus muralis</i>    |
| PS108-78 | MB   | 16S | 601  | OP808272 | <i>Bacillus wiedmannii</i> (99%) [NR_152692.1]<br><i>Bacillus thuringiensis</i> (99%) [CP020754.1]<br><i>Bacillus thuringiensis</i> (99%) [CP021061.1]                 | <i>Bacillus</i> sp.        |
| PS108-80 | MB   | 16S | 438  | OP808273 | <i>Bacillus pumilus</i> (100%) [LT906438.1]<br><i>Bacillus pumilus</i> (100%) [KX261622.1]<br><i>Bacillus pumilus</i> (100%) [NR_112637.1]                             | <i>Bacillus</i> sp.        |
| PS108-82 | MB   | 16S | 412  | OP808274 | <i>Bacillus subtilis</i> (100%) [CP029465.1]<br><i>Bacillus subtilis</i> (100%) [MH145363.1]<br><i>Bacillus nakamurai</i> (100%) [NR_151897.1]                         | <i>Bacillus</i> sp.        |
| PS108-85 | MB   | 16S | 521  | OP808275 | <i>Bacillus simplex</i> (99%) [CP017704.1]<br><i>Bacillus simplex</i> (99%) [NR_114919.1]<br><i>Bacillus simplex</i> (99%) [NR_112726.1]                               | <i>Bacillus</i> sp.        |
| PS108-90 | MB   | 16S | 1144 | OP808276 | <i>Bacillus thioparans</i> (100%) [NR_043762.1]<br><i>Bacillus foraminis</i> (99%) [NR_042274.1]<br><i>Bacillus mediterraneensis</i> (99%) [LT161888.2]                | <i>Bacillus</i> sp.        |
| PS108-94 | MB   | 16S | 438  | OP808277 | <i>Bacillus aquimaris</i> (100%) [NR_025241.1]<br><i>Bacillus marisflavi</i> (99%) [NR_118437.1]<br><i>Bacillus vietnamensis</i> (99%) [NR_113995.1]                   | <i>Bacillus aquimaris</i>  |
| PS108-30 | TSB3 | 16S | 509  | OP808278 | <i>Psychrobacillus soli</i> (99%) [NR_137244.1] <i>Psychrobacillus soli</i> (99%) [KJ956929.1] <i>Psychrobacillus insolitus</i> (99%) [NR_042709.1]                    | <i>Psychrobacillus</i> sp. |
| PS108-34 | TSB3 | 16S | 1045 | OP808279 | <i>Psychrobacillus soli</i> (99%) [NR_137244.1] <i>Psychrobacillus soli</i> (99%) [KJ956929.1]<br><i>Psychrobacillus psychrodurans</i> (99%) [KP219721.1]              | <i>Psychrobacillus</i> sp. |

|           |      |     |      |          |                                                                                                                                                                            |                                     |
|-----------|------|-----|------|----------|----------------------------------------------------------------------------------------------------------------------------------------------------------------------------|-------------------------------------|
| PS108-36b | TSB3 | 16S | 694  | OP808280 | <i>Psychrobacillus soli</i> (99%) [NR_137244.1] <i>Psychrobacillus soli</i> (99%) [KJ956929.1]<br><i>Psychrobacillus psychrotolerans</i> (99%) [NR_025409.1]               | <i>Psychrobacillus</i> sp.          |
| PS108-29a | TSB3 | 16S | 1156 | OP808281 | <i>Paenibacillus turicensis</i> (98%) [NR_114626.1]<br><i>Paenibacillus turicensis</i> (98%) [NR_114624.1]<br><i>Paenibacillus turicensis</i> (97%) [NR_114625.1]          | <i>Paenibacillus</i> sp.            |
| PS108-48b | TSB3 | 16S | 1067 | OP808282 | <i>Paenibacillus sinopodophylli</i> (99%) [NR_153706.1]<br><i>Paenibacillus sinopodophylli</i> (99%) [KX009022.1]<br><i>Paenibacillus endophyticus</i> (97%) [NR_135705.1] | <i>Paenibacillus</i> sp.            |
| PS108-48c | TSB3 | 16S | 563  | OP808283 | <i>Paenibacillus tundrae</i> (99%) [NR_044525.1]<br><i>Paenibacillus xylanexedens</i> (99%) [NR_044524.1]<br><i>Paenibacillus amylolyticus</i> (99%) [NR_025882.1]         | <i>Paenibacillus</i> sp.            |
| PS108-11b | TSB3 | 16S | 1134 | OP808284 | <i>Staphylococcus pasteurii</i> (100%) [MG757632.1]<br><i>Staphylococcus pasteurii</i> (100%) [NR_114435.1]<br><i>Staphylococcus pasteurii</i> (100%) [NR_024669.1]        | <i>Staphylococcus pasteurii</i>     |
| PS108-11a | TSB3 | 16S | 438  | OP808285 | <i>Staphylococcus pasteurii</i> (100%) [MG757632.1]<br><i>Staphylococcus pasteurii</i> (100%) [NR_114435.1]<br><i>Staphylococcus pasteurii</i> (100%) [NR_024669.1]        | <i>Staphylococcus pasteurii</i>     |
| PS108-24  | TSB3 | 16S | 476  | OP808286 | <i>Staphylococcus saprophyticus</i> (99%) [MG988385.1]<br><i>Staphylococcus saprophyticus</i> (99%) [NR_074999.2]<br><i>Staphylococcus edaphicus</i> (99%) [NR_156818.1]   | <i>Staphylococcus saprophyticus</i> |
| PS108-58  | MB   | 16S | 444  | OP808287 | <i>Staphylococcus warneri</i> (99%) [NR_025922.1]<br><i>Staphylococcus pasteurii</i> (99%) [MG757632.1]<br><i>Staphylococcus pasteurii</i> (99%) [NR_114435.1]             | <i>Staphylococcus warneri</i>       |
| PS108-17a | TSB3 | 16S | 1088 | OP808288 | <i>Paenisporosarcina indica</i> (99%) [NR_108473.1]<br><i>Sporosarcina antarctica</i> (99%) [NR_044122.1]<br><i>Paenisporosarcina quisquiliarum</i> (99%) [NR_043720.1]    | <i>Paenisporosarcina</i> sp.        |
| PS108-13  | TSB3 | 16S | 494  | OP808289 | <i>Peribacillus simplex</i> (99%) [CP017704.1]<br><i>Peribacillus frigoritolerans</i> (99%) [MW578406.1]<br><i>Peribacillus frigoritolerans</i> (99%) [OL824805.1]         | <i>Peribacillus</i> sp.             |
| PS108-74  | MB   | 16S | 494  | OP808290 | <i>Micrococcus yunnanensis</i> (100%) [NR_116578.1]<br><i>Micrococcus luteus</i> (99%) [LS483396.1]                                                                        | <i>Micrococcus yunnanensis</i>      |



|           |    |     |      |          |                                                                                                                                                                      |                                    |
|-----------|----|-----|------|----------|----------------------------------------------------------------------------------------------------------------------------------------------------------------------|------------------------------------|
| PS108-66  | MB | 16S | 570  | OP808291 | <i>Litoreibacter ascidiaceicola</i> (99%) [NR_134068.1]<br><i>Litoreibacter halocynthiae</i> (99%) [NR_118472.1]<br><i>Litoreibacter albidus</i> (99%) [NR_112984.1] | <i>Litoreibacter</i> sp.           |
| PS108-86  | MB | 16S | 1107 | OP808292 | <i>Hoeflea alexandrii</i> (99%) [NR_042321.1]<br><i>Hoeflea halophila</i> (99%) [NR_108835.1]<br><i>Hoeflea marina</i> (98%) [NR_043007.1]                           | <i>Hoeflea alexandrii</i>          |
| PS108-59  | MB | 16S | 1146 | OP808293 | <i>Stenotrophomonas rhizophila</i> (100%) [NR_121739.1]<br><i>Stenotrophomonas rhizophila</i> (100%) [CP007597.1]                                                    | <i>Stenotrophomonas rhizophila</i> |
| PS108-84a | MB | 16S | 1084 | OP808294 | <i>Stenotrophomonas rhizophila</i> (100%) [NR_121739.1]<br><i>Stenotrophomonas rhizophila</i> (100%) [CP007597.1]                                                    | <i>Stenotrophomonas rhizophila</i> |
| PS108-84b | MB | 16S | 1158 | OP808295 | <i>Stenotrophomonas rhizophila</i> (100%) [NR_121739.1]<br><i>Stenotrophomonas rhizophila</i> (100%) [CP007597.1]                                                    | <i>Stenotrophomonas rhizophila</i> |
| PS108-72  | MB | 16S | 362  | OP808296 | <i>Shewanella morhuae</i> (98%) [NR_113968.1]<br><i>Shewanella xiamenensis</i> (98%) [NR_116732.1]<br><i>Shewanella morhuae</i> (98%) [NR_041299.1]                  | <i>Shewanella</i> sp.              |
| PS108-91  | MB | 16S | 571  | OP808297 | <i>Shewanella arctica</i> (99%) [NR_117528.1]<br><i>Shewanella vesiculosa</i> (99%) [NR_042710.1]<br><i>Shewanella livingstonensis</i> (99%) [NR_025443.1]           | <i>Shewanella</i> sp.              |
| PS108-60  | MB | 16S | 413  | OP808298 | <i>Colwellia sediminilitoris</i> (99%) [NR_151990.1]<br><i>Colwellia sediminilitoris</i> (99%) [KU696539.1]<br><i>Colwellia aestuarii</i> (99%) [NR_043509.1]        | <i>Colwellia</i> sp.               |
| PS108-73  | MB | 16S | 340  | OP808299 | <i>Sinobacterium norvegicum</i> (98%) [NR_144601.1]<br><i>Sinobacterium norvegicum</i> (98%) [HG004165.1]<br><i>Sinobacterium caligoides</i> (98%) [NR_109307.1]     | <i>Sinobacterium norvegicum</i>    |
| PS108-96  | MB | 16S | 380  | OP808300 | <i>Arsukibacterium ikkense</i> (98%) [DQ112664.2]<br><i>Alishewanella tabrizica</i> (98%) [NR_117388.1]<br><i>Rheinheimera perlucida</i> (98%) [NR_042487.1]         | <i>Rheinheimera perlucida</i>      |
| PS108-98  | MB | 16S | 394  | OP808301 | <i>Glaciecola polaris</i> (99%) [NR_025427.1]<br><i>Glaciecola agarilytica</i> (98%) [NR_043956.1]<br><i>Glaciecola chathamensis</i> (98%) [NR_041397.1]             | <i>Glaciecola polaris</i>          |
| PS108-77  | MB | 16S | 485  | OP808302 | <i>Algoriphagus ratkovskyi</i> (99%) [NR_042219.1]<br><i>Algoriphagus aquimarinus</i> (99%) [NR_025602.1]<br><i>Algoriphagus antarcticus</i> (99%) [NR_025604.1]     | <i>Algoriphagus ratkovskyi</i>     |



|          |       |     |      |          |                                                                                                                                                                       |                                   |
|----------|-------|-----|------|----------|-----------------------------------------------------------------------------------------------------------------------------------------------------------------------|-----------------------------------|
| PS108-79 | MB    | 16S | 572  | OP808303 | <i>Algoriphagus ratkovskyi</i> (99%) [NR_042219.1]<br><i>Algoriphagus aquimatinus</i> (99%) [NR_025602.1]<br><i>Algoriphagus antarcticus</i> (99%) [NR_025604.1]      | <i>Algoriphagus ratkovskyi</i>    |
| PS108-65 | MB    | 16S | 1102 | OP808304 | <i>Marinobacter psychrophilus</i> (100%) [CP011494.1]<br><i>Marinobacter psychrophilus</i> (99%) [NR_043513.1]<br><i>Marinobacter antarcticus</i> (99%) [NR_108299.1] | <i>Marinobacter psychrophilus</i> |
| PS108-76 | MB    | 16S | 505  | OP808305 | <i>Sediminicola arcticus</i> (99%) [KM576847.1]<br><i>Sediminicola luteus</i> (99%) [NR_113965.1]<br><i>Sediminicola luteus</i> (99%) [NR_041301.1]                   | <i>Sediminicola arcticus</i>      |
| PS108-75 | MB    | 16S | 539  | OP808306 | <i>Maribacter arcticus</i> (99%) [NR_043176.1]<br><i>Maribacter orientalis</i> (99%) [NR_025749.1]                                                                    | <i>Maribacter arcticus</i>        |
| PS108-89 | MB    | 16S | 352  | OP808307 | <i>Maribacter arcticus</i> (100%) [NR_043176.1]<br><i>Maribacter orientalis</i> (100%) [NR_025749.1]<br><i>Maribacter arcticus</i> (99%) [NR_044515.1]                | <i>Maribacter arcticus</i>        |
| PS108-04 | WSP30 | ITS | 547  | OP807022 | <i>Emericellopsis maritima</i> (99%) [NR_144919.1]<br><i>Emericellopsis maritima</i> (99%) [AY632670.1]<br><i>Emericellopsis stolckiae</i> (98%) [NR_156197.1]        | <i>Emericellopsis maritima</i>    |
| PS108-55 | MB    | ITS | 442  | OP807023 | <i>Emericellopsis maritima</i> (96.5%) [MH871998.1]                                                                                                                   | <i>Emericellopsis</i> sp.         |
| PS108-61 | MB    | ITS | 354  | OP807025 | <i>Emericellopsis maritima</i> (100%) [NR_144919.1]<br><i>Emericellopsis minima</i> (99%) [AY632669.1]<br><i>Emericellopsis minima</i> (99%) [KC987173.1]             | <i>Emericellopsis maritima</i>    |
| PS108-05 | WSP30 | ITS | 432  | OP807026 | <i>Protomyces inouyei</i> (97%) [NR_121206.1]<br><i>Protomyces inouyei</i> (97%) [DQ497617.1]                                                                         | <i>Protomyces</i> sp.             |
| PS108-06 | WSP30 | ITS | 507  | OP807028 | <i>Protomyces inouyei</i> (97%) [NR_121206.1]<br><i>Protomyces inouyei</i> (97%) [DQ497617.1]                                                                         | <i>Protomyces</i> sp.             |
| PS108-62 | MB    | ITS | 327  | OP807024 | <i>Aspergillus versicolor</i> (99%) [KU729039.1]<br><i>Aspergillus versicolor</i> (99%) [NR_131277.1]<br><i>Aspergillus protuberus</i> (99%) [NR_135353.1]            | <i>Aspergillus versicolor</i>     |
| PS108-03 | PDA   | ITS | 314  | OP807027 | <i>Kondoa aerea</i> (99%) [KY103882.1]<br><i>Kondoa aerea</i> (99%) [NR_073307.1]<br><i>Kondoa malvinella</i> (96%) [DQ667165.1]                                      | <i>Kondoa aerea</i>               |

**Table S2.** In vitro activity of the crude extracts of the six selected fungi grown in four media (% inhibition, tested at 100 µg/mL). The symbol (-) indicates inhibition level below 20%. A375: Malignant melanoma, A549: Lung carcinoma, MB231: Breast cancer, HCT116: Colon cancer, HaCaT: human keratinocyte cell line; Efm: *Enterococcus faecium*, MRSA: Methicillin-resistant *Staphylococcus aureus*, Ab: *Acinetobacter baumannii*, Kp: *Klebsiella pneumoniae*, Psa: *Pseudomonas aeruginosa*, Ec: *Escherichia coli*; Ca: *Candida albicans*, Cn: *Cryptococcus neoformans*.

| Samples          |         | Cell culture |      |        |        |       | ESKAPE |      |    |    |     |    | Yeasts |    |
|------------------|---------|--------------|------|--------|--------|-------|--------|------|----|----|-----|----|--------|----|
| Strains          | Medium  | A375         | A549 | MB-231 | HCT116 | HaCaT | Efm    | MRSA | Kp | Ab | Psa | Ec | Ca     | Cn |
| PS108-3          | PDA     | -            | -    | -      | -      | -     | -      | 94   | -  | -  | -   | -  | -      | -  |
|                  | Rice    | -            | -    | -      | -      | -     | -      | 100  | -  | -  | -   | -  | -      | -  |
|                  | GPY     | -            | -    | -      | -      | -     | 88     | 99   | -  | -  | -   | -  | -      | -  |
|                  | GPY+KBr | -            | -    | -      | -      | -     | -      | 52   | -  | -  | -   | -  | -      | 26 |
| PS108-4          | PDA     | -            | -    | -      | -      | -     | -      | 82   | -  | -  | -   | -  | -      | -  |
|                  | Rice    | -            | -    | -      | -      | -     | -      | 61   | -  | -  | -   | -  | -      | 22 |
|                  | GPY     | -            | -    | -      | -      | -     | -      | 79   | -  | -  | -   | -  | -      | -  |
|                  | GPY+KBr | -            | -    | -      | -      | -     | -      | 69   | -  | -  | -   | -  | -      | 44 |
| PS108-5          | PDA     | -            | -    | -      | -      | -     | -      | 68   | -  | -  | -   | -  | -      | -  |
|                  | Rice    | -            | -    | -      | -      | -     | 51     | 99   | -  | -  | -   | -  | -      | -  |
|                  | GPY     | -            | -    | -      | -      | -     | -      | 89   | -  | -  | -   | -  | -      | -  |
|                  | GPY+KBr | -            | -    | -      | -      | -     | -      | 90   | -  | -  | -   | -  | -      | -  |
| PS108-55         | PDA     | -            | -    | -      | -      | -     | -      | 78   | -  | -  | -   | -  | -      | -  |
|                  | Rice    | -            | -    | -      | -      | -     | -      | 67   | -  | -  | -   | -  | -      | 26 |
|                  | GPY     | -            | -    | -      | -      | -     | -      | 88   | -  | -  | -   | -  | -      | -  |
|                  | GPY+KBr | -            | -    | -      | -      | -     | -      | 75   | -  | -  | -   | -  | -      | 45 |
| PS108-61         | PDA     | 25           | -    | -      | -      | -     | -      | 66   | -  | -  | -   | -  | 85     | 20 |
|                  | Rice    | -            | -    | -      | -      | -     | -      | 72   | -  | -  | -   | -  | -      | 38 |
|                  | GPY     | -            | -    | -      | -      | -     | -      | 92   | -  | -  | -   | -  | -      | 22 |
|                  | GPY+KBr | -            | -    | -      | -      | -     | -      | 75   | -  | -  | -   | -  | -      | 46 |
| PS108-62         | PDA     | 60           | 20   | 43     | 29     | 45    | -      | 76   | -  | -  | -   | -  | 95     | 21 |
|                  | Rice    | -            | -    | -      | -      | -     | -      | 53   | -  | -  | -   | -  | 89     | -  |
|                  | GPY     | -            | -    | -      | -      | -     | -      | -    | -  | -  | -   | -  | 26     | -  |
|                  | GPY+KBr | 41           | 35   | 48     | 33     | 38    | -      | 44   | -  | -  | -   | -  | 89     | -  |
| Positive control |         | 76           | 67   | 76     | 66     | 85    | 83     | 98   | 99 | 99 | 99  | 97 | 96     | 96 |

**Table S3.** In vitro activity of the crude extracts of 32 selected bacteria grown on four media (%-inhibition, tested at 100 µg/mL ). MA: marine agar, SCK: starch casein KNO<sub>3</sub>, GYM: glucose yeast malt, GYM+Br: glucose yeast malt supplemented with KBr). The symbol (-) indicates inhibition level below 20%. A375: Malignant melanoma, A549: Lung carcinoma, MB231: Breast cancer, HCT116: Colon cancer, HaCaT: human keratinocyte cell line; Efm: *Enterococcus faecium*, MRSA: Methicillin-resistant *Staphylococcus aureus*, Ab: *Acinetobacter baumannii*, Kp: *Klebsiella pneumoniae*, Psa: *Pseudomonas aeruginosa*, Ec: *Escherichia coli*; Ca: *Candida albicans*, Cn: *Cryptococcus neoformans*.

| Samples   |        | Cell culture |      |       |        |       | ESKAPE |      |    |    |     |    | Fungi |    |
|-----------|--------|--------------|------|-------|--------|-------|--------|------|----|----|-----|----|-------|----|
| Strains   | Media  | A375         | A549 | MB231 | HCT116 | HaCaT | Efm    | MRSA | Kp | Ab | Psa | Ec | Ca    | Cn |
| PS108-13  | MA     | -            | -    | -     | -      | -     | 100    | 100  | -  | -  | -   | -  | -     | -  |
|           | GYM    | -            | -    | -     | -      | -     | 80     | 53   | -  | -  | -   | -  | -     | -  |
|           | GYM+Br | -            | -    | -     | -      | -     | 100    | 100  | -  | -  | -   | -  | -     | -  |
|           | SCK    | -            | -    | -     | -      | -     | -      | 99   | -  | -  | -   | -  | -     | -  |
| PS108-16  | MA     | -            | -    | -     | -      | -     | 100    | 100  | -  | -  | -   | -  | -     | -  |
|           | GYM    | -            | -    | -     | -      | -     | 100    | 100  | -  | -  | -   | -  | -     | -  |
|           | GYM+Br | -            | -    | -     | -      | -     | -      | 100  | -  | -  | -   | -  | -     | -  |
|           | SCK    | -            | -    | -     | -      | -     | 100    | 100  | -  | -  | -   | -  | -     | -  |
| PS108-25  | MA     | -            | -    | -     | -      | -     | -      | 48   | -  | -  | -   | -  | -     | -  |
|           | GYM    | -            | -    | -     | -      | -     | -      | 100  | -  | -  | -   | -  | -     | -  |
|           | GYM+Br | -            | -    | -     | -      | -     | -      | 100  | -  | -  | -   | -  | -     | -  |
|           | SCK    | -            | -    | -     | -      | -     | -      | 45   | -  | -  | -   | -  | -     | -  |
| PS108-36b | MA     | -            | -    | -     | -      | -     | -      | -    | -  | -  | -   | -  | -     | -  |
|           | GYM    | -            | -    | -     | 24     | -     | -      | -    | -  | -  | -   | -  | -     | -  |
|           | GYM+Br | -            | -    | -     | -      | -     | -      | -    | -  | -  | -   | -  | -     | -  |
|           | SCK    | -            | -    | -     | -      | -     | 97     | 95   | -  | -  | -   | -  | -     | -  |
| PS108-37  | MA     | -            | -    | -     | -      | -     | 100    | 97   | -  | -  | -   | -  | -     | -  |
|           | GYM    | -            | -    | -     | 27     | -     | 100    | 100  | -  | -  | -   | -  | -     | -  |
|           | GYM+Br | -            | -    | -     | 25     | -     | 100    | 101  | -  | -  | -   | -  | -     | -  |
|           | SCK    | -            | -    | -     | -      | -     | 88     | 83   | -  | -  | -   | -  | -     | -  |
| PS108-48b | MA     | -            | -    | -     | -      | -     | -      | -    | -  | -  | -   | -  | -     | -  |
|           | GYM    | -            | -    | -     | -      | -     | -      | 31   | -  | -  | -   | -  | -     | -  |
|           | GYM+Br | -            | -    | -     | -      | -     | -      | 43   | -  | -  | -   | -  | -     | -  |
|           | SCK    | -            | -    | -     | -      | -     | -      | -    | -  | -  | -   | -  | -     | -  |
| PS108-48c | MA     | -            | -    | -     | -      | -     | -      | -    | -  | -  | -   | -  | -     | -  |
|           | GYM    | -            | -    | -     | -      | -     | 62     | 49   | -  | -  | -   | -  | -     | -  |
|           | GYM+Br | -            | -    | -     | -      | -     | -      | -    | -  | -  | -   | -  | -     | -  |
|           | SCK    | -            | -    | -     | -      | -     | -      | -    | -  | -  | -   | -  | -     | -  |
| PS108-33  | MA     | -            | -    | -     | -      | -     | 42     | -    | -  | -  | -   | -  | -     | -  |
|           | GYM    | -            | -    | -     | 20     | -     | 100    | 100  | -  | -  | -   | -  | -     | -  |
|           | GYM+Br | -            | -    | -     | 22     | -     | 100    | 99   | -  | -  | -   | -  | -     | -  |
|           | SCK    | -            | -    | -     | 23     | -     | 64     | 64   | -  | -  | -   | -  | -     | -  |

|           |        |    |    |    |    |    |     |     |   |    |   |   |   |    |
|-----------|--------|----|----|----|----|----|-----|-----|---|----|---|---|---|----|
| PS108-34  | MA     | -  | -  | -  | -  | -  | 57  | 26  | - | -  | - | - | - | -  |
|           | GYM    | -  | -  | -  | -  | 35 | 45  | 68  | - | -  | - | - | - | -  |
|           | GYM+Br | -  | -  | -  | 38 | 22 | -   | 38  | - | -  | - | - | - | -  |
|           | SCK    | -  | -  | -  | 25 | -  | 46  | 71  | - | -  | - | - | - | -  |
| PS108-39  | MA     | -  | -  | -  | -  | 24 | 100 | 85  | - | -  | - | - | - | -  |
|           | GYM    | -  | -  | -  | 20 | 26 | 100 | 100 | - | -  | - | - | - | -  |
|           | GYM+Br | -  | -  | -  | 21 | -  | 100 | 98  | - | -  | - | - | - | -  |
|           | SCK    | -  | -  | -  | -  | -  | 100 | 100 | - | -  | - | - | - | -  |
| PS108-58  | MA     | -  | -  | -  | -  | -  | -   | -   | - | 24 | - | - | - | -  |
|           | GYM    | -  | -  | -  | -  | -  | 100 | 97  | - | -  | - | - | - | -  |
|           | GYM+Br | -  | -  | -  | -  | -  | 99  | 97  | - | -  | - | - | - | -  |
|           | SCK    | -  | -  | -  | -  | -  | 91  | 71  | - | -  | - | - | - | -  |
| PS108-70  | MA     | -  | -  | -  | -  | -  | 22  | 32  | - | -  | - | - | - | -  |
|           | GYM    | 23 | -  | -  | -  | -  | 53  | 66  | - | -  | - | - | - | -  |
|           | GYM+Br | 25 | -  | -  | -  | -  | 44  | 68  | - | -  | - | - | - | -  |
|           | SCK    | -  | -  | -  | 22 | -  | 53  | -   | - | -  | - | - | - | -  |
| PS108-74  | MA     | -  | -  | -  | -  | -  | 34  | -   | - | -  | - | - | - | -  |
|           | GYM    | -  | -  | -  | -  | 23 | 100 | 99  | - | -  | - | - | - | -  |
|           | GYM+Br | -  | -  | -  | 22 | 28 | 87  | 47  | - | -  | - | - | - | -  |
|           | SCK    | -  | -  | -  | 23 | -  | 77  | 26  | - | -  | - | - | - | -  |
| PS108-80  | MA     | -  | -  | -  | -  | -  | -   | 64  | - | -  | - | - | - | -  |
|           | GYM    | -  | -  | -  | -  | 29 | 27  | 74  | - | -  | - | - | - | -  |
|           | GYM+Br | -  | -  | -  | 20 | 36 | 52  | 75  | - | -  | - | - | - | -  |
|           | SCK    | -  | -  | -  | 24 | -  | 55  | 81  | - | -  | - | - | - | -  |
| PS108-82  | MA     | -  | -  | -  | -  | -  | 60  | 56  | - | -  | - | - | - | -  |
|           | GYM    | -  | -  | -  | -  | -  | 71  | 48  | - | -  | - | - | - | -  |
|           | GYM+Br | -  | -  | -  | -  | -  | 79  | 67  | - | -  | - | - | - | -  |
|           | SCK    | -  | -  | -  | -  | -  | 61  | 45  | - | -  | - | - | - | -  |
| PS108-85  | MA     | -  | -  | -  | -  | -  | 100 | 92  | - | -  | - | - | - | -  |
|           | GYM    | 20 | -  | -  | -  | -  | 100 | 99  | - | -  | - | - | - | -  |
|           | GYM+Br | -  | -  | -  | -  | -  | 91  | 82  | - | -  | - | - | - | -  |
|           | SCK    | -  | -  | -  | -  | -  | 53  | 62  | - | -  | - | - | - | -  |
| PS108-17  | MA     | -  | -  | -  | -  | -  | -   | 25  | - | -  | - | - | - | -  |
|           | GYM    | 21 | -  | -  | -  | -  | -   | 31  | - | -  | - | - | - | -  |
|           | GYM+Br | 36 | 31 | -  | -  | 35 | -   | 43  | - | -  | - | - | - | 23 |
| PS108-54  | MA     | -  | -  | 39 | 28 | -  | 100 | 100 | - | -  | - | - | - | -  |
|           | GYM    | -  | -  | -  | -  | -  | -   | 54  | - | -  | - | - | - | -  |
|           | GYM+Br | -  | -  | -  | -  | -  | 100 | 98  | - | -  | - | - | - | -  |
| PS108-67a | MA     | -  | -  | -  | -  | -  | -   | 59  | - | -  | - | - | - | 52 |
|           | GYM    | 94 | 46 | -  | -  | 79 | -   | -   | - | -  | - | - | - | 33 |
|           | GYM+Br | 99 | 80 | 74 | 70 | 99 | -   | 40  | - | -  | - | - | - | -  |
|           | SCK    | -  | -  | 99 | 99 | -  | -   | 35  | - | -  | - | - | - | -  |

|                  |        |    |    |    |    |    |     |     |    |    |    |    |    |     |
|------------------|--------|----|----|----|----|----|-----|-----|----|----|----|----|----|-----|
| PS108-84a        | MA     | -  | -  | -  | -  | -  | 100 | 100 | -  | -  | -  | -  | -  | 32  |
|                  | GYM    | -  | -  | -  | -  | -  | 100 | 100 | -  | -  | -  | -  | -  | 53  |
|                  | GYM+Br | -  | -  | -  | -  | -  | 100 | 100 | -  | -  | -  | -  | -  | -   |
|                  | SCK    | -  | -  | -  | -  | -  | 100 | 100 | -  | -  | -  | -  | -  | -   |
| PS108-89         | MA     | -  | -  | -  | -  | -  | -   | -   | -  | -  | -  | -  | -  | 29  |
|                  | GYM    | -  | -  | -  | -  | -  | -   | 29  | -  | -  | -  | -  | -  | -   |
|                  | GYM+Br | -  | -  | -  | -  | -  | -   | -   | -  | -  | -  | -  | -  | -   |
| PS108-90         | MA     | -  | -  | -  | -  | -  | -   | -   | -  | -  | -  | -  | -  | -   |
|                  | GYM    | -  | -  | -  | -  | -  | -   | 57  | -  | -  | -  | -  | -  | -   |
|                  | GYM+Br | -  | -  | -  | -  | -  | -   | 51  | -  | -  | -  | -  | -  | -   |
| PS108-94         | MA     | -  | -  | -  | -  | -  | 27  | 82  | -  | -  | -  | -  | -  | -   |
|                  | GYM    | 24 | -  | -  | -  | -  | 100 | 100 | -  | -  | -  | -  | -  | 28  |
|                  | GYM+Br | 34 | -  | -  | -  | -  | 100 | 100 | -  | -  | -  | -  | -  | 58  |
| PS108-98         | MA     | -  | -  | 25 | -  | -  | 100 | 100 | -  | -  | -  | -  | -  | -   |
|                  | GYM    | -  | -  | -  | -  | -  | 100 | 100 | -  | -  | -  | -  | -  | 27  |
|                  | GYM+Br | -  | -  | -  | -  | -  | 100 | 100 | -  | -  | -  | -  | -  | 57  |
| PS108-60         | MA     | -  | -  | -  | -  | -  | 100 | 100 | -  | -  | -  | -  | -  | 21  |
|                  | GYM    | -  | -  | -  | -  | -  | -   | 31  | -  | -  | -  | -  | -  | -   |
|                  | GYM+Br | -  | -  | -  | -  | -  | 97  | 93  | -  | -  | -  | -  | -  | 21  |
| PS108-65         | MA     | -  | -  | -  | -  | -  | 95  | 97  | -  | -  | -  | -  | -  | -   |
|                  | GYM    | -  | -  | -  | -  | -  | 100 | 97  | -  | -  | -  | -  | -  | -   |
| PS108-66         | MA     | -  | -  | -  | -  | -  | 33  | 24  | -  | -  | -  | -  | -  | -   |
|                  | GYM    | -  | -  | -  | -  | -  | 59  | 95  | -  | -  | -  | -  | -  | -   |
|                  | GYM+Br | -  | -  | -  | -  | -  | 29  | 20  | -  | -  | -  | -  | -  | -   |
| PS108-76         | MA     | -  | -  | -  | -  | 20 | -   | -   | -  | -  | -  | -  | -  | -   |
|                  | GYM    | -  | -  | -  | -  | -  | -   | -   | -  | -  | -  | -  | -  | -   |
| PS108-77         | MA     | -  | -  | -  | -  | -  | 74  | 46  | -  | -  | -  | -  | -  | -   |
|                  | GYM    | -  | -  | -  | -  | -  | 23  | -   | -  | -  | -  | -  | -  | -   |
|                  | GYM+Br | -  | -  | -  | -  | -  | 70  | 76  | -  | -  | -  | -  | -  | -   |
| PS108-86         | MA     | -  | -  | -  | -  | -  | 31  | 48  | -  | -  | -  | -  | -  | -   |
|                  | GYM    | -  | -  | -  | -  | -  | 78  | 99  | -  | -  | -  | -  | -  | 30  |
|                  | GYM+Br | -  | -  | -  | -  | -  | 79  | 99  | -  | -  | -  | -  | 24 | -   |
| PS108-91         | MA     | -  | -  | -  | -  | -  | 100 | 97  | -  | -  | -  | -  | -  | 43  |
|                  | GYM    | -  | -  | -  | -  | -  | 100 | 99  | -  | -  | -  | -  | -  | -   |
|                  | GYM+Br | -  | -  | -  | -  | -  | 98  | 94  | -  | -  | -  | -  | -  | 33  |
| PS108-96         | MA     | -  | -  | -  | -  | -  | 100 | 100 | -  | -  | -  | -  | -  | -   |
|                  | GYM    | -  | -  | -  | -  | -  | 100 | 100 | -  | -  | -  | -  | -  | -   |
|                  | GYM+Br | 95 | -  | -  | -  | 98 | 100 | 100 | -  | -  | -  | -  | -  | 54  |
| Positive control |        | 89 | 88 | 89 | 88 | 88 | 87  | 95  | 90 | 99 | 99 | 99 | 92 | 100 |

**Table S4.** Manual dereplication of the main peaks from the UPLC-MS/MS chromatogram of the GYM and GYM+Br media extracts of *B. licheniformis* PS108-67a.

| tr (min)      | Ion formula                                                    | Putative compound  | Observed <i>m/z</i> | Δ ppm | Ref. |
|---------------|----------------------------------------------------------------|--------------------|---------------------|-------|------|
| 10.55         | C <sub>51</sub> H <sub>91</sub> N <sub>8</sub> O <sub>12</sub> | Lichenysin G13     | 1007.6754           | -0.2  | [1]  |
| 10.74         | C <sub>55</sub> H <sub>89</sub> N <sub>8</sub> O <sub>12</sub> | unknown lichenysin | 1053.6635           | 3.3   |      |
| 10.96 / 11.03 | C <sub>52</sub> H <sub>93</sub> N <sub>8</sub> O <sub>12</sub> | Lichenysin G14     | 1021.691            | -0.3  | [1]  |
| 11.31 / 11.43 | C <sub>53</sub> H <sub>95</sub> N <sub>8</sub> O <sub>12</sub> | Lichenysin G15*    | 1035.707            | 0.1   | [1]  |
| 11.69         | C <sub>54</sub> H <sub>97</sub> N <sub>8</sub> O <sub>12</sub> | Lichenysin G8a     | 1049.7234           | 1.1   | [1]  |
| 12.10         | C <sub>55</sub> H <sub>93</sub> N <sub>8</sub> O <sub>12</sub> | unknown lichenysin | 1063.7383           | -0.3  |      |

\*Only dereplicated manually from raw data but not annotated in MN (Figure 2 in the main text)

**Table S5.** Dereplication of the main peaks from the UPLC-MS/MS chromatogram of the GPY+Br, PDA and rice media extracts of *A. versicolor* PS108-62.

| tr (min)           | Ion formula                                                   | Compound            | Observed <i>m/z</i> | Δ ppm | Ref.  |
|--------------------|---------------------------------------------------------------|---------------------|---------------------|-------|-------|
| 2.89               | C <sub>13</sub> H <sub>14</sub> N <sub>3</sub>                |                     | 212.1192            | 1.9   |       |
| 3.63               | C <sub>17</sub> H <sub>15</sub> N <sub>2</sub> O <sub>4</sub> | Cyclopenol          | 311.1033            | 1.9   | [2]   |
| 6.10*              | C <sub>19</sub> H <sub>24</sub> N <sub>3</sub> O <sub>4</sub> | Protubonine A*      | 358.1768            | 0.3   | [3,4] |
| 6.42               | C <sub>19</sub> H <sub>26</sub> N <sub>3</sub> O <sub>4</sub> | Versicomide D       | 360.1923            | -0.3  | [5]   |
| 7.17               | C <sub>19</sub> H <sub>26</sub> N <sub>3</sub> O <sub>3</sub> | Versicomide A       | 344.1975            | 1.5   | [5]   |
| 7.26               | C <sub>19</sub> H <sub>24</sub> N <sub>3</sub> O <sub>3</sub> | Versicomide B       | 342.1818            | 0.1   | [5]   |
| 7.89               | C <sub>41</sub> H <sub>72</sub> NO <sub>12</sub>              | Burnettram acid A   | 770.5042            | -1.7  | [6,7] |
| 7.96 / 8.06 / 8.20 | C <sub>29</sub> H <sub>48</sub> NO <sub>6</sub>               |                     | 506.3488            | 1.2   |       |
| 8.77               | C <sub>19</sub> H <sub>32</sub> N <sub>10</sub> ONa           |                     | 439.2671            | 3.0   |       |
| 10.55              | C <sub>29</sub> H <sub>49</sub> NO <sub>5</sub> Na            | Versicolide A (new) | 514.3511            | 0.6   |       |
| 10.76              | C <sub>22</sub> H <sub>42</sub> O <sub>6</sub> Na             |                     | 425.2880            | -0.5  |       |
| 11.53              | C <sub>18</sub> H <sub>38</sub> NO                            |                     | 284.296             | 0.6   |       |
| 12.43              | C <sub>20</sub> H <sub>42</sub> NO                            |                     | 312.3268            | -0.6  |       |
| 13.04              | C <sub>28</sub> H <sub>44</sub> N                             |                     | 394.3472            | -0.5  |       |
| 13.70              | C <sub>43</sub> H <sub>79</sub> NO <sub>9</sub> Na            | Cerebroside deriv.  | 776.5644            | -1.2  | [8,9] |

\*Not observed in Rice and PDA media.

Table S6. Results of DFT-NMR studies of model compounds **1m**.

|                                                                                                        | <i>RRR-1n</i> | <i>RRS-1n</i> | <i>RSR-1n</i> | <i>RSS-1n</i> | <i>SRR-1n</i> | <i>SRS-1n</i> | <i>SSR-1n</i> | <i>SSS-1n</i> |
|--------------------------------------------------------------------------------------------------------|---------------|---------------|---------------|---------------|---------------|---------------|---------------|---------------|
| Unique conformers within 5 kcal/mol<br>force field CFF91                                               | 104           | 53            | 152           | 42            | 103           | 76            | 168           | 58            |
| Unique conformers within 3.5 kcal/mol<br>DFT, optimization B3LYP/6-31G(d,p)                            | 13            | 19            | 21            | 15            | 51            | 19            | 45            | 20            |
| Conformers populated >1% at 298 K<br>DFT, single point B3LYP/6-31G(d,p)/SMD                            | 9             | 12            | 10            | 11            | 18            | 8             | 19            | 13            |
| RMSD vs. <b>1</b> of predicted <sup>13</sup> C NMR chemical shifts<br>mPW1PW91/6-311+G(2d,p)/PCM(MeOH) | 2.52          | 2.61          | 2.58          | 2.09          | 2.86          | 3.58          | 2.52          | 3.15          |
| RMSD vs. <b>1</b> of predicted <sup>1</sup> H NMR chemical shifts<br>mPW1PW91/6-311+G(2d,p)/PCM(MeOH)  | 0.198         | 0.190         | 0.131         | 0.091         | 0.176         | 0.236         | 0.169         | 0.147         |
| DP4+ probability<br>scaled shifts                                                                      | 0.00%         | 0.00%         | 0.01%         | 99.98%        | 0.00%         | 0.00%         | 0.01%         | 0.00%         |

Table S7. Predicted NMR chemical shift and DP4+ analysis for diastereomeric model compounds **1m**.

| Functional<br>mPW1PW91 |        |      | Solvent?<br>PCM      | Basis Set?<br>6-311+G(d,p) |               |               | Type of Data<br>Scaled Shifts |               |               |               |               |
|------------------------|--------|------|----------------------|----------------------------|---------------|---------------|-------------------------------|---------------|---------------|---------------|---------------|
|                        |        |      | DP4+<br>Experimental | 0.00%                      | 0.00%         | 0.01%         | 99.98%                        | 0.00%         | 0.00%         | 0.01%         | 0.00%         |
|                        |        |      | DP4+<br>Experimental | -                          | -             | -             | -                             | -             | -             | -             | -             |
|                        | Nuclei | sp2? | Experimental         | <i>RRR-1m</i>              | <i>RRS-1m</i> | <i>RSR-1m</i> | <i>RSS-1m</i>                 | <i>SRR-1m</i> | <i>SRS-1m</i> | <i>SSR-1m</i> | <i>SSS-1m</i> |
| C-1                    | C      | x    | 172.1                | 175.1                      | 173.3         | 172.8         | 173.9                         | 174.0         | 174.3         | 173.0         | 172.9         |
| C-2                    | C      |      | 51.5                 | 52.4                       | 52.8          | 51.5          | 51.9                          | 54.7          | 55.7          | 53.9          | 56.8          |
| C-4                    | C      | x    | 170.3                | 168.2                      | 168.7         | 166.7         | 167.4                         | 170.8         | 170.9         | 170.2         | 170.3         |
| C-5                    | C      |      | 56.9                 | 58.1                       | 54.0          | 57.4          | 59.9                          | 56.9          | 51.4          | 57.6          | 57.0          |
| C-6                    | C      | x    | 212.8                | 212.8                      | 221.2         | 219.6         | 214.2                         | 219.8         | 222.0         | 219.9         | 222.5         |
| C-7                    | C      |      | 46.2                 | 50.9                       | 47.8          | 42.9          | 46.3                          | 50.5          | 51.3          | 47.8          | 50.7          |
| C-8                    | C      |      | 44.7                 | 44.5                       | 46.6          | 47.4          | 45.3                          | 43.2          | 46.0          | 43.6          | 44.8          |
| C-9                    | C      | x    | 134.9                | 141.73                     | 137.21        | 138.17        | 140.59                        | 138.12        | 136.71        | 140.21        | 138.35        |
| C-10                   | C      | x    | 130.6                | 132.46                     | 131.97        | 132.00        | 131.02                        | 130.50        | 131.28        | 130.11        | 132.67        |
| C-11                   | C      |      | 35.9                 | 38.32                      | 36.82         | 37.53         | 37.44                         | 37.13         | 36.61         | 37.08         | 36.78         |
| C-12                   | C      |      | 87.0                 | 84.68                      | 84.28         | 83.18         | 84.12                         | 83.84         | 84.35         | 83.64         | 84.55         |
| C-20                   | C      |      | 40.1                 | 41.52                      | 38.45         | 39.91         | 40.43                         | 39.45         | 39.27         | 40.93         | 40.36         |
| C-21                   | C      |      | 26.0                 | 28.02                      | 27.54         | 27.53         | 27.94                         | 27.85         | 27.97         | 27.70         | 27.83         |
| C-22                   | C      |      | 23.0                 | 20.60                      | 20.30         | 20.77         | 20.93                         | 20.47         | 20.34         | 20.84         | 20.78         |
| C-23                   | C      |      | 22.5                 | 20.96                      | 21.38         | 21.08         | 20.89                         | 20.78         | 20.84         | 20.34         | 20.36         |
| C-24                   | C      |      | 14.8                 | 12.73                      | 17.33         | 11.85         | 12.48                         | 19.83         | 21.39         | 13.96         | 17.87         |
| C-25                   | C      |      | 18.8                 | 20.11                      | 17.53         | 19.42         | 18.50                         | 16.52         | 15.97         | 19.39         | 18.55         |
| C-26                   | C      |      | 16.1                 | 17.30                      | 15.12         | 15.38         | 15.57                         | 18.33         | 15.11         | 18.17         | 15.50         |
| C-27                   | C      |      | 17.4                 | 16.89                      | 16.74         | 16.80         | 16.77                         | 17.04         | 16.62         | 17.11         | 16.60         |
| H-2                    | H      |      | 4.44                 | 4.63                       | 3.89          | 4.49          | 4.56                          | 4.06          | 3.79          | 4.42          | 4.02          |
| H-5                    | H      |      | 3.73                 | 3.70                       | 3.51          | 3.37          | 3.84                          | 3.69          | 3.69          | 3.20          | 3.59          |
| H-7                    | H      |      | 3.24                 | 2.75                       | 3.04          | 3.31          | 3.48                          | 3.13          | 2.85          | 3.11          | 3.21          |
| H-8a                   | H      |      | 2.54                 | 2.51                       | 2.40          | 2.42          | 2.57                          | 2.54          | 2.33          | 2.42          | 2.59          |
| H-8b                   | H      |      | 1.84                 | 1.96                       | 2.21          | 2.07          | 1.92                          | 2.39          | 2.30          | 2.10          | 1.94          |
| H-10                   | H      |      | 4.80                 | 4.98                       | 4.96          | 4.90          | 4.86                          | 4.80          | 4.94          | 4.71          | 5.04          |
| H-11                   | H      |      | 2.69                 | 2.72                       | 2.76          | 2.74          | 2.77                          | 2.72          | 2.79          | 2.79          | 2.86          |
| H-12                   | H      |      | 4.51                 | 4.97                       | 4.46          | 4.68          | 4.60                          | 4.39          | 4.30          | 4.70          | 4.40          |
| H-20a                  | H      |      | 1.61                 | 1.49                       | 1.60          | 1.50          | 1.51                          | 1.57          | 1.51          | 1.53          | 1.82          |
| H-20b                  | H      |      | 1.52                 | 1.44                       | 1.58          | 1.47          | 1.40                          | 1.50          | 1.49          | 1.48          | 1.59          |
| H-21                   | H      |      | 1.53                 | 1.59                       | 1.65          | 1.57          | 1.51                          | 1.59          | 1.57          | 1.60          | 1.50          |
| H3-22                  | H      |      | 0.91                 | 0.91                       | 0.86          | 0.86          | 0.87                          | 0.95          | 0.96          | 0.95          | 0.91          |
| H3-23                  | H      |      | 0.88                 | 0.92                       | 0.89          | 0.88          | 0.90                          | 0.89          | 0.89          | 0.93          | 0.91          |
| H3-24                  | H      |      | 1.29                 | 1.17                       | 1.38          | 1.43          | 1.20                          | 1.36          | 1.35          | 1.44          | 1.32          |
| H3-25                  | H      |      | 1.07                 | 1.06                       | 1.15          | 1.09          | 1.06                          | 1.22          | 1.21          | 1.10          | 1.14          |
| H3-26                  | H      |      | 1.68                 | 1.37                       | 1.65          | 1.61          | 1.70                          | 1.68          | 1.70          | 1.60          | 1.78          |
| H3-27                  | H      |      | 0.76                 | 0.76                       | 0.71          | 0.71          | 0.75                          | 0.78          | 0.72          | 0.81          | 0.75          |



Table S8. Results of DFT-NMR studies of compounds **1** and tris-*epi*-**1**.

| Compound                                                                                                                               | <b>1</b> | tris- <i>epi</i> - <b>1</b> |
|----------------------------------------------------------------------------------------------------------------------------------------|----------|-----------------------------|
| Conformers populated >1% at 298 K                                                                                                      | 16       | 15                          |
| DFT, optimization B3LYP/6-31G(d,p)/SMD                                                                                                 |          |                             |
| RMSD vs. experimental chemical shifts of <b>1</b> of predicted <sup>13</sup> C NMR chemical shifts<br>mPW1PW91/6-311+G(2d,p)/PCM(MeOH) | 1.88     | 2.07                        |
| RMSD vs. experimental chemical shifts of <b>1</b> of predicted <sup>1</sup> H NMR chemical shifts<br>mPW1PW91/6-311+G(2d,p)/PCM(MeOH)  | 0.092    | 0.108                       |
| DP4+ probability<br>scaled shifts                                                                                                      | 99.93%   | 0.07%                       |

Table S9. Predicted NMR chemical shift and DP4+ analysis for compounds **1** and tris-*epi*-**1**.

| Functional<br>mPW1PW91 |        |      | Solvent?<br>PCM | Basis Set?<br>6-311+G(d,p) |          |          | Type of Data<br>Scaled Shifts |          |
|------------------------|--------|------|-----------------|----------------------------|----------|----------|-------------------------------|----------|
|                        |        |      | sDP4+           | 99.93%                     | 0.07%    | -        | -                             | -        |
|                        |        |      | DP4+            | -                          | -        | -        | -                             | -        |
|                        | Nuclei | sp2? | Experimental    | Isomer 1                   | Isomer 2 | Isomer 3 | Isomer 4                      | Isomer 5 |
| C-1                    | C      | x    | 172.1           | 173.7                      | 173.7    |          |                               |          |
| C-2                    | C      |      | 51.5            | 51.1                       | 50.8     |          |                               |          |
| C-4                    | C      | x    | 170.3           | 167.3                      | 167.3    |          |                               |          |
| C-5                    | C      |      | 56.9            | 59.3                       | 59.4     |          |                               |          |
| C-6                    | C      | x    | 212.8           | 215.9                      | 215.8    |          |                               |          |
| C-7                    | C      |      | 46.2            | 46.9                       | 46.8     |          |                               |          |
| C-8                    | C      |      | 44.7            | 45.0                       | 45.0     |          |                               |          |
| C-9                    | C      | x    | 134.9           | 140.04                     | 139.94   |          |                               |          |
| C-10                   | C      | x    | 130.6           | 131.77                     | 132.11   |          |                               |          |
| C-11                   | C      |      | 35.9            | 36.83                      | 37.34    |          |                               |          |
| C-12                   | C      |      | 87.0            | 87.16                      | 87.10    |          |                               |          |
| C-13                   | C      | x    | 133.2           | 135.37                     | 135.62   |          |                               |          |
| C-14                   | C      | x    | 134.7           | 138.79                     | 139.26   |          |                               |          |
| C-15                   | C      |      | 36.5            | 38.38                      | 38.98    |          |                               |          |
| C-16                   | C      |      | 79.5            | 78.85                      | 78.64    |          |                               |          |
| C-17                   | C      |      | 38.7            | 39.33                      | 38.60    |          |                               |          |
| C-18                   | C      |      | 27.3            | 27.77                      | 28.49    |          |                               |          |
| C-19                   | C      |      | 11.8            | 11.25                      | 11.70    |          |                               |          |
| C-20                   | C      |      | 40.1            | 39.66                      | 39.30    |          |                               |          |
| C-21                   | C      |      | 26.0            | 27.36                      | 27.28    |          |                               |          |
| C-22                   | C      |      | 23.0            | 21.31                      | 20.80    |          |                               |          |
| C-23                   | C      |      | 22.5            | 21.10                      | 21.52    |          |                               |          |
| C-24                   | C      |      | 14.8            | 12.74                      | 12.54    |          |                               |          |
| C-25                   | C      |      | 18.8            | 18.58                      | 18.51    |          |                               |          |
| C-26                   | C      |      | 16.1            | 15.87                      | 15.87    |          |                               |          |
| C-27                   | C      |      | 17.4            | 16.74                      | 16.69    |          |                               |          |
| C-28                   | C      |      | 11.8            | 11.94                      | 12.19    |          |                               |          |
| C-29                   | C      |      | 17.9            | 17.03                      | 16.47    |          |                               |          |
| C-30                   | C      |      | 14.5            | 11.74                      | 10.54    |          |                               |          |
| H-2                    | H      |      | 4.44            | 4.58                       | 4.63     |          |                               |          |
| H-5                    | H      |      | 3.73            | 3.87                       | 3.85     |          |                               |          |
| H-7                    | H      |      | 3.24            | 3.43                       | 3.43     |          |                               |          |
| H-8a                   | H      |      | 2.54            | 2.62                       | 2.61     |          |                               |          |
| H-8b                   | H      |      | 1.84            | 1.91                       | 1.90     |          |                               |          |
| H-10                   | H      |      | 4.80            | 4.89                       | 4.89     |          |                               |          |
| H-11                   | H      |      | 2.69            | 2.82                       | 2.79     |          |                               |          |
| H-12                   | H      |      | 4.51            | 4.40                       | 4.32     |          |                               |          |
| H-14                   | H      |      | 5.51            | 5.52                       | 5.49     |          |                               |          |
| H-15                   | H      |      | 2.64            | 2.54                       | 2.50     |          |                               |          |
| H-16                   | H      |      | 3.20            | 3.01                       | 3.03     |          |                               |          |
| H-17                   | H      |      | 1.44            | 1.46                       | 1.54     |          |                               |          |
| H-18a                  | H      |      | 1.42            | 1.40                       | 1.45     |          |                               |          |
| H-18b                  | H      |      | 1.12            | 1.24                       | 1.34     |          |                               |          |
| H3-19                  | H      |      | 0.87            | 0.90                       | 0.93     |          |                               |          |
| H-20a                  | H      |      | 1.61            | 1.51                       | 1.48     |          |                               |          |
| H-20b                  | H      |      | 1.52            | 1.40                       | 1.44     |          |                               |          |
| H-21                   | H      |      | 1.53            | 1.55                       | 1.54     |          |                               |          |
| H3-22                  | H      |      | 0.91            | 0.87                       | 0.89     |          |                               |          |
| H3-23                  | H      |      | 0.88            | 0.89                       | 0.92     |          |                               |          |
| H3-24                  | H      |      | 1.29            | 1.19                       | 1.19     |          |                               |          |
| H3-25                  | H      |      | 1.07            | 1.08                       | 1.08     |          |                               |          |
| H3-26                  | H      |      | 1.68            | 1.71                       | 1.72     |          |                               |          |
| H3-27                  | H      |      | 0.76            | 0.79                       | 0.83     |          |                               |          |
| H3-28                  | H      |      | 1.61            | 1.67                       | 1.66     |          |                               |          |
| H3-29                  | H      |      | 0.94            | 0.94                       | 0.90     |          |                               |          |
| H3-30                  | H      |      | 0.91            | 0.88                       | 0.83     |          |                               |          |

**Table S10.** Comparison of the 1D NMR data of **3** and (+)-versicomide A (both in CD<sub>3</sub>OD)

| Position | Versicomide A*<br>$\delta_{\text{H}}$ , Mult. (J in Hz) | <b>3</b><br>$\delta_{\text{H}}$ , Mult. (J in Hz) | Versicomide A*<br>$\delta_{\text{C}}$ | <b>3</b><br>$\delta_{\text{C}}$ |
|----------|---------------------------------------------------------|---------------------------------------------------|---------------------------------------|---------------------------------|
| 1        | -                                                       | -                                                 | 170.5, C                              | 170.6, C                        |
| 2        | -                                                       | -                                                 | -                                     | -                               |
| 3        | 4.72, d (2.3)                                           | 4.72, d (2.2)                                     | 59.8, CH                              | 59.7, CH                        |
| 4        | -                                                       | -                                                 | 149.7, C                              | 149.6, C                        |
| 5        | -                                                       | -                                                 | -                                     | -                               |
| 6        | -                                                       | -                                                 | 143.1, C                              | 143.0, C                        |
| 7        | 7.65, d (8.9)                                           | 7.64, d (8.9)                                     | 130.3, CH                             | 130.3, CH                       |
| 8        | 7.45, dd (8.9, 2.9)                                     | 7.44, dd (8.9, 2.9)                               | 125.9, CH                             | 126.0, CH                       |
| 9        | -                                                       | -                                                 | 160.3, C                              | 160.3, C                        |
| 10       | 7.63, d (2.9)                                           | 7.62, d (2.9)                                     | 107.5, CH                             | 107.1, CH                       |
| 11       | -                                                       | -                                                 | 122.1, C                              | 121.9, C                        |
| 12       | -                                                       | -                                                 | 162.7, C                              | 162.7, C                        |
| 13       | -                                                       | -                                                 | -                                     | -                               |
| 14       | 5.18, d (8.2)                                           | 5.17, d (8.3)                                     | 62.3, CH                              | 62.2, CH                        |
| 15       | 2.33, m                                                 | 2.32, m                                           | 32.2, CH                              | 32.6, CH                        |
| 16       | 0.99, d (6.8)                                           | 0.98, d (6.8)                                     | 20.5, CH <sub>3</sub>                 | 20.3, CH <sub>3</sub>           |
| 17       | 1.13, d (6.7)                                           | 1.12, d (6.7)                                     | 19.5, CH <sub>3</sub>                 | 19.3, CH <sub>3</sub>           |
| 18       | 2.74, m                                                 | 2.73, m                                           | 37.9, CH                              | 37.7, CH                        |
| 19       | 1.21, d (7.2)                                           | 1.20, d (7.2)                                     | 15.8, CH <sub>3</sub>                 | 15.6, CH <sub>3</sub>           |
| 20       | 1.49, m, 1.36 m                                         | 1.49, m, 1.36, m                                  | 24.7, CH <sub>2</sub>                 | 24.6, CH <sub>2</sub>           |
| 21       | 0.96, t (7.4)                                           | 0.96, t (7.5)                                     | 12.9, CH <sub>3</sub>                 | 12.8, CH <sub>3</sub>           |
| 22       | 3.94, s                                                 | 3.92, s                                           | 56.4, CH <sub>3</sub>                 | 56.3, CH <sub>3</sub>           |

\* Data reported for versicomide A in the literature [10]

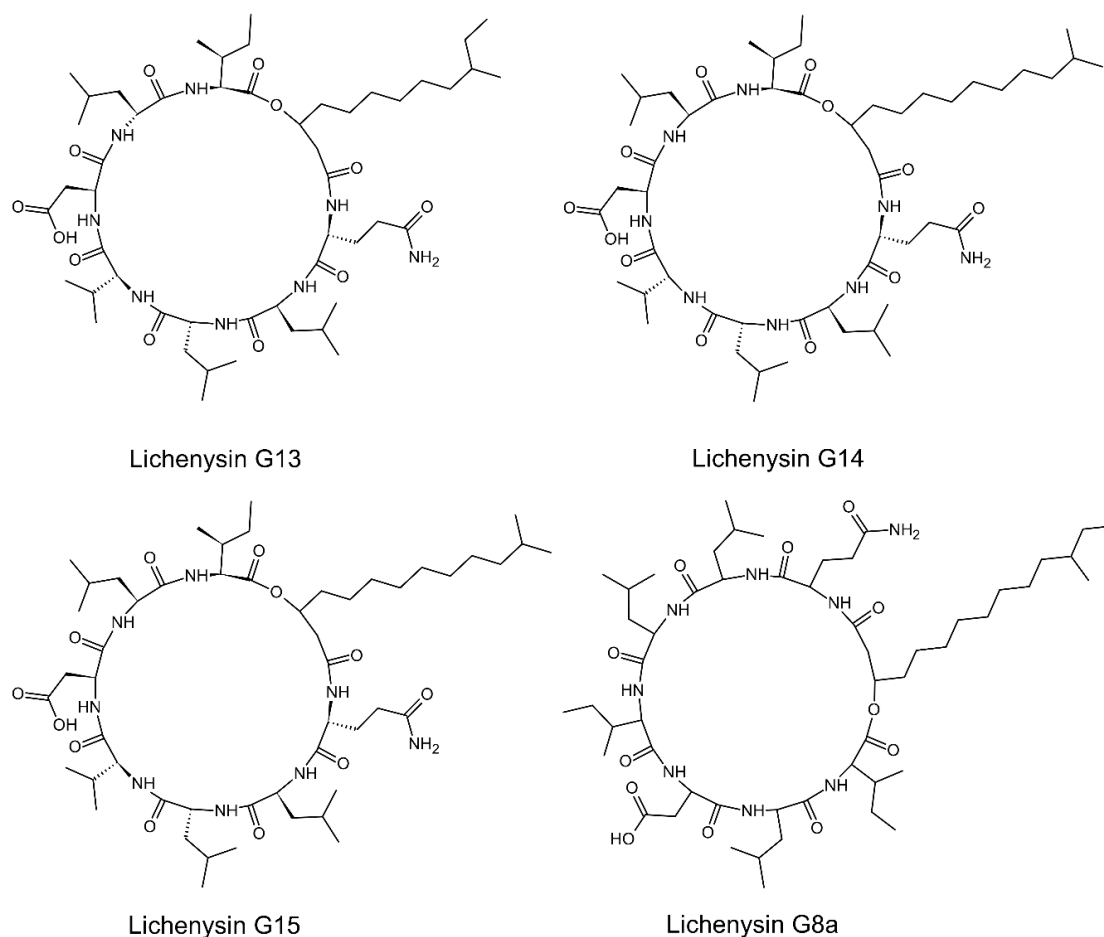

**Figure S1.** Structures of lichenysins manually dereplicated from the GYM and GYM+Br media extracts of *B. licheniformis* PS108-67a.

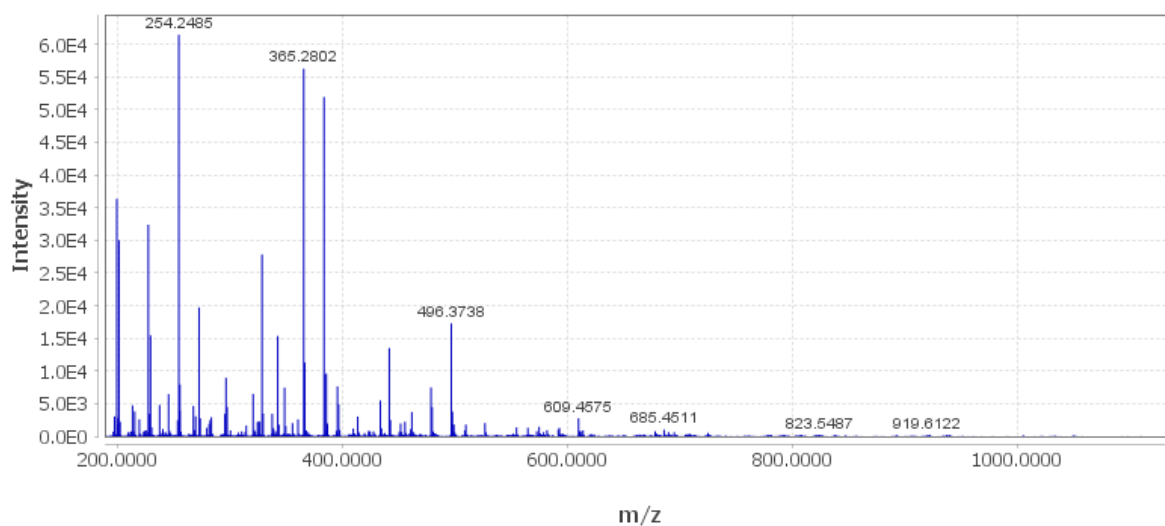

**Figure S2.** MS/MS spectrum of lichenysin G8a ( $C_{54}H_{97}N_8O_{12}$ ,  $m/z$  1049.7234  $[M+H]^+$ ).

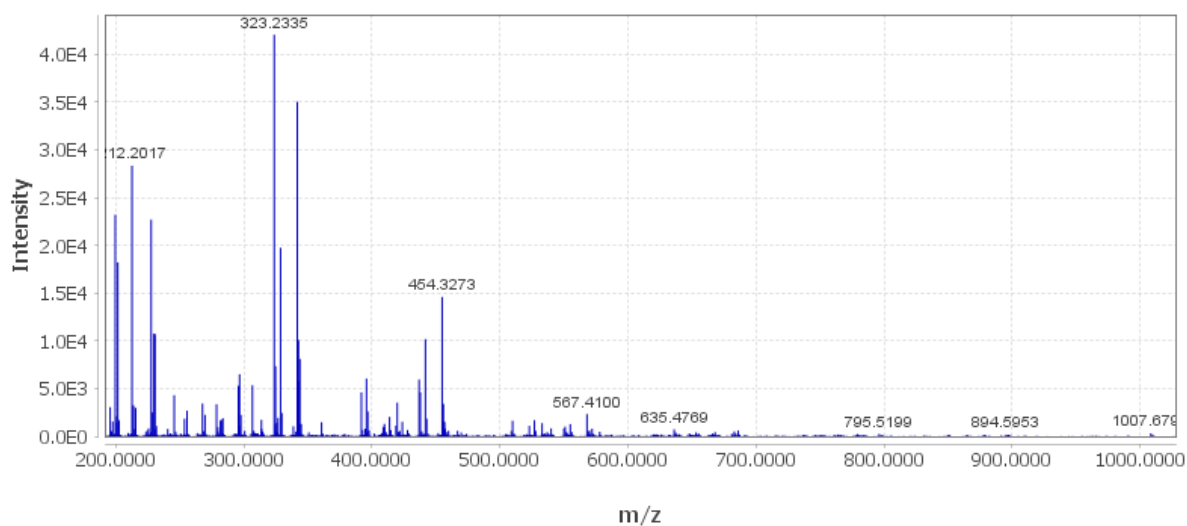

**Figure S3.** MS/MS spectrum of lichenysin G13 ( $C_{51}H_{91}N_8O_{12}$ ,  $m/z$  1007.6754  $[M+H]^+$ ).

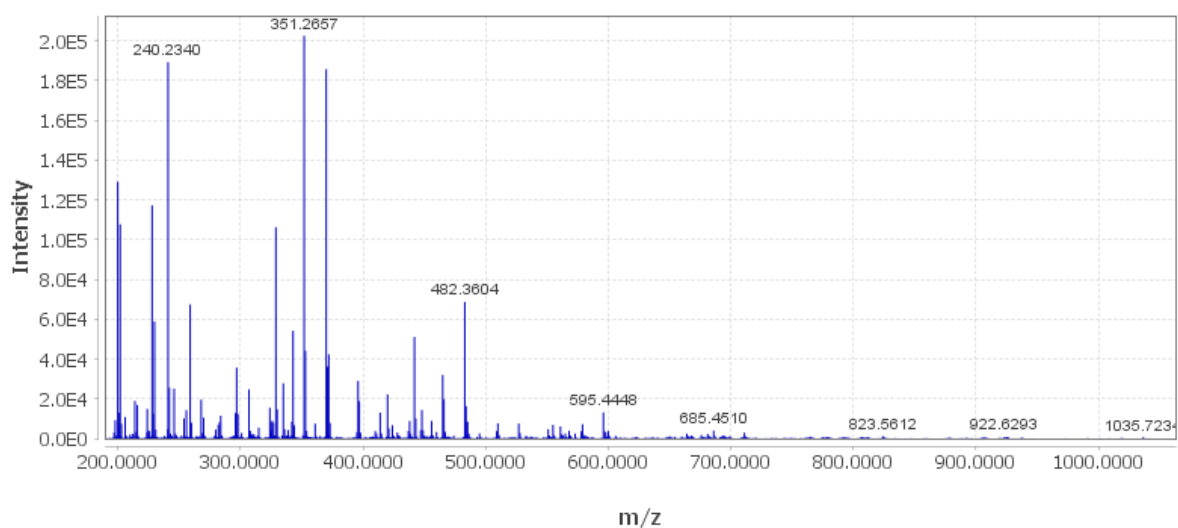

**Figure S4.** MS/MS spectrum of lichenysin G14 ( $C_{52}H_{93}N_8O_{12}$ ,  $m/z$  1021.691  $[M+H]^+$ ).

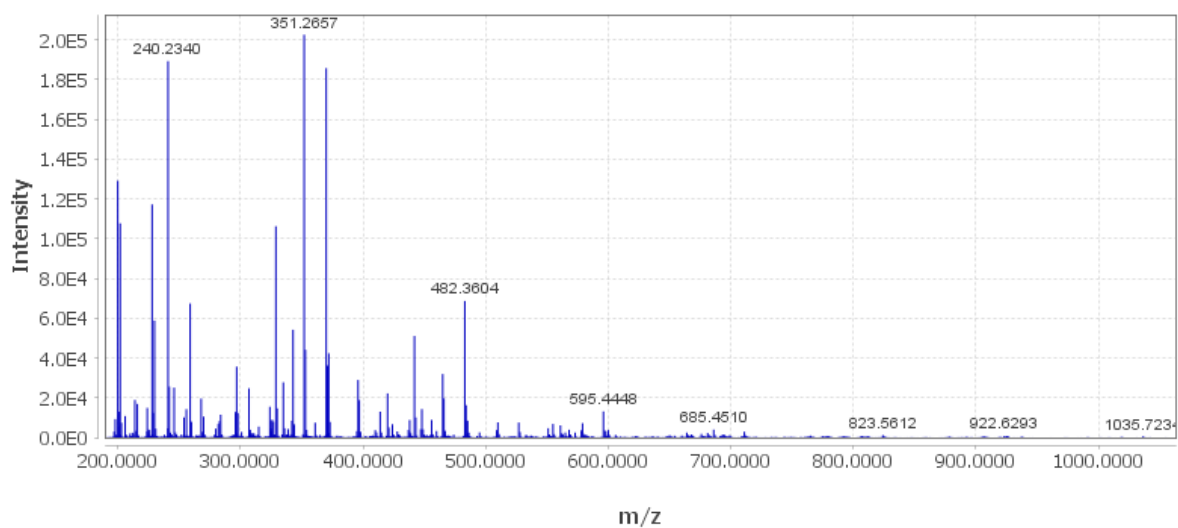

**Figure S5.** MS/MS spectrum of lichenysin G15 ( $C_{53}H_{95}N_8O_{12}$ ,  $m/z$  1035.707  $[M+H]^+$ ).

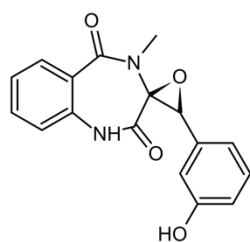

Cyclophenol

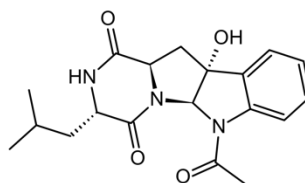

Protubonine A\*

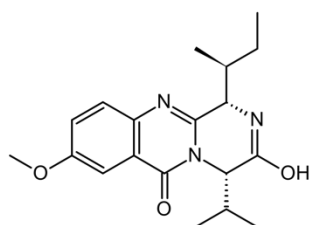

Versicomide A

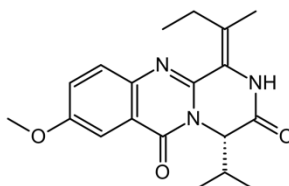

Versicomide B

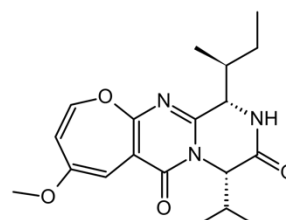

Versicomide D

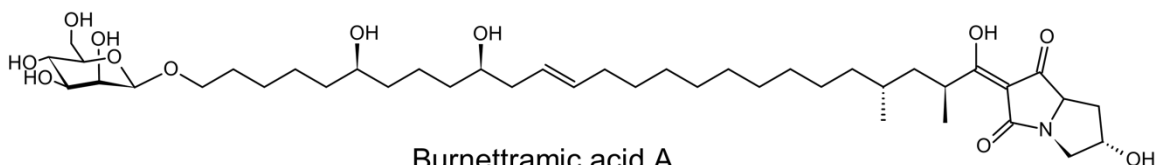

Burnettramic acid A

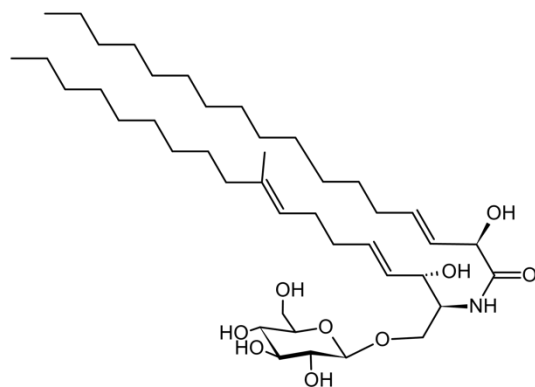

Cerebroside derivative (e.g. Flavuside B)

**Figure S6.** Structures of the compounds annotated from the GPY+Br, PDA and rice media extracts of the strain *A. versicolor* PS108-62. \*Protubonine A was not observed in PDA and Rice media.

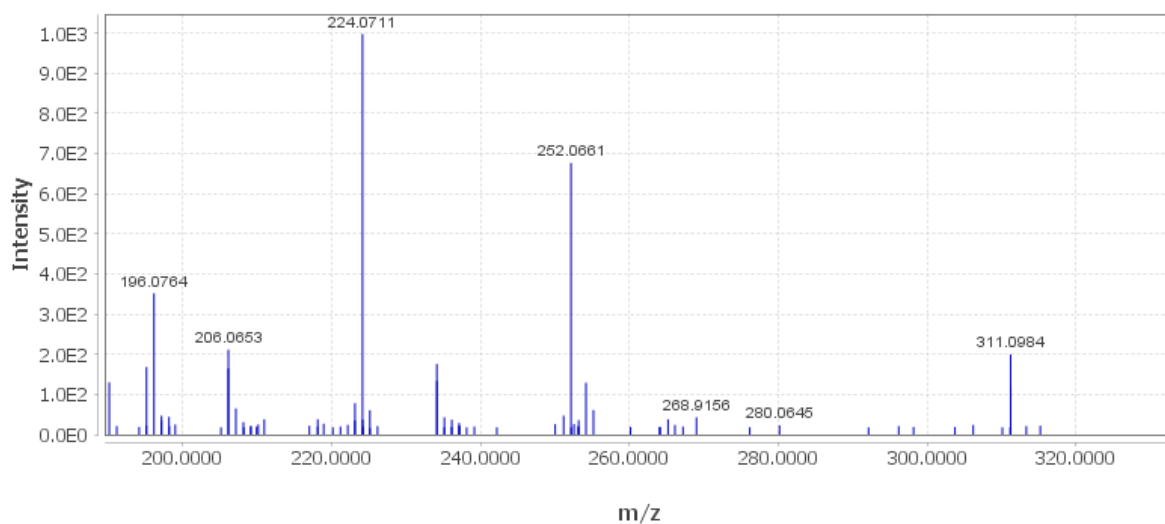

**Figure S7.** MS/MS spectrum of cyclopol ( $C_{17}H_{15}N_2O_4$ ,  $m/z$  311.1033  $[M+H]^+$ ).

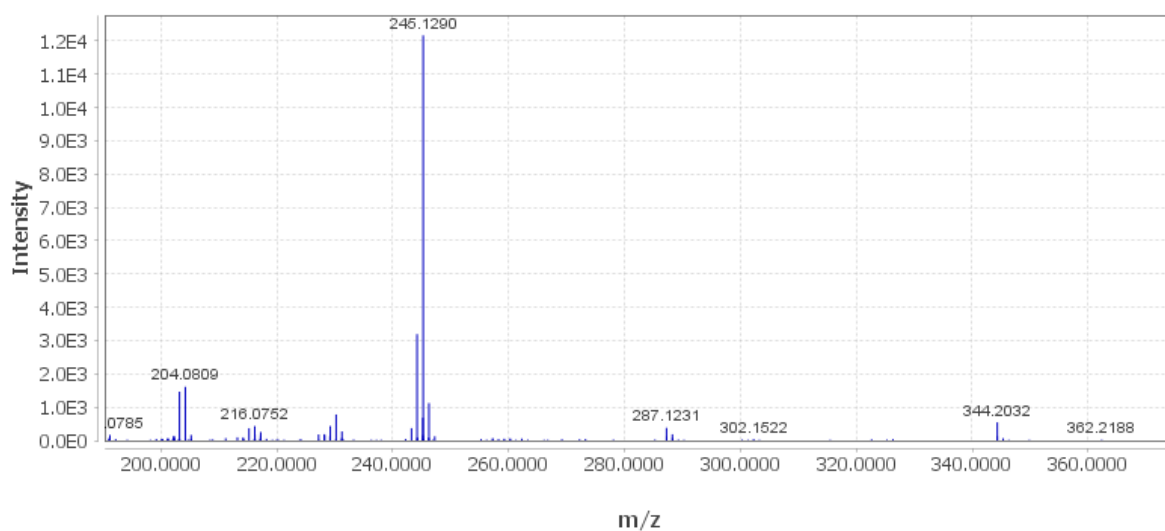

**Figure S8.** MS/MS spectrum of versicomide A ( $C_{19}H_{26}N_3O_3$ ,  $m/z$  344.1975  $[M+H]^+$ ).

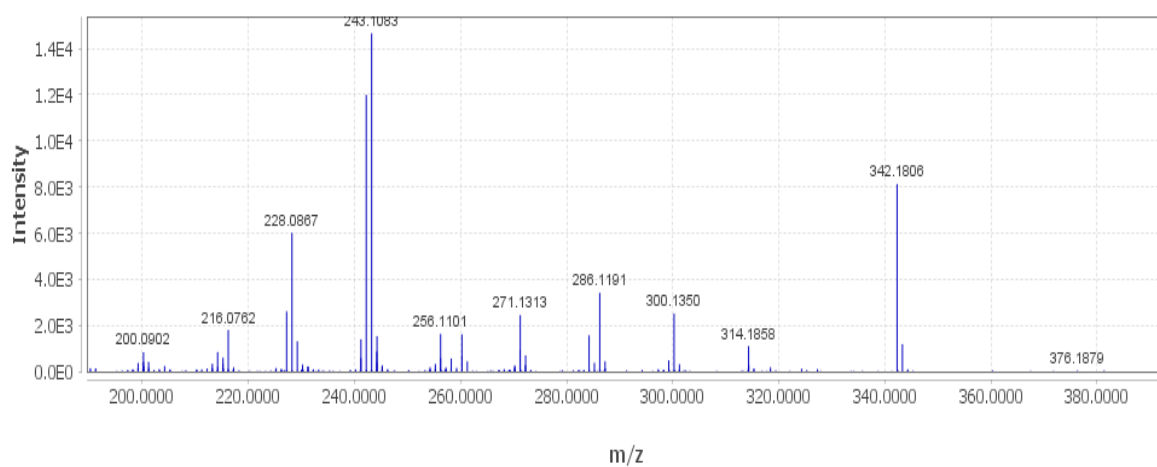

**Figure S9.** MS/MS spectrum of versicomide B ( $C_{19}H_{24}N_3O_3$ ,  $m/z$  342.1818  $[M+H]^+$ ).

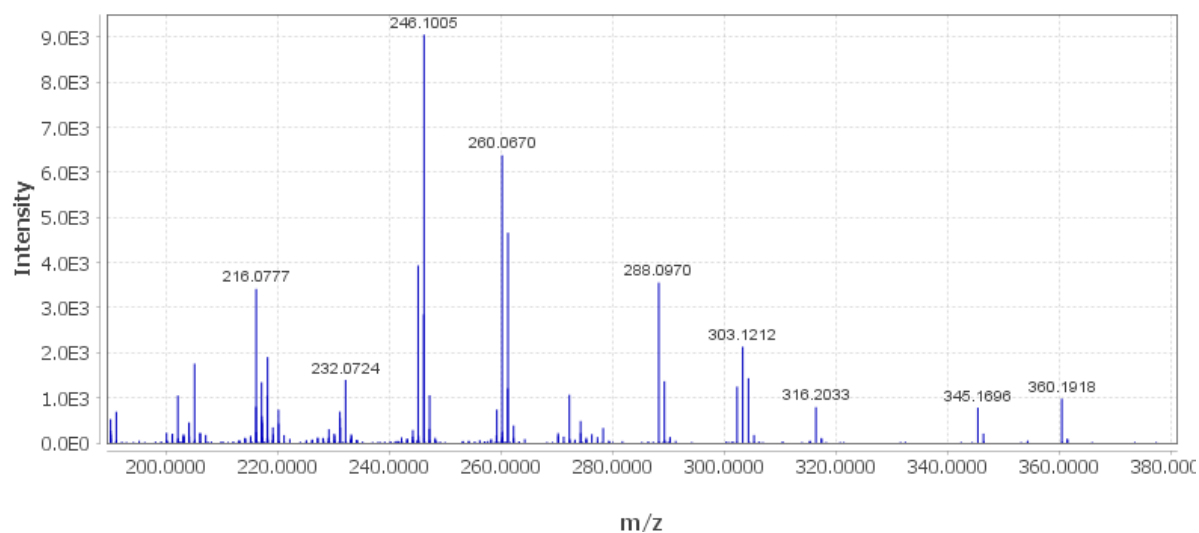

**Figure S10.** MS/MS spectrum of versicomide D ( $C_{19}H_{26}N_3O_4$   $m/z$  360.1923  $[M+H]^+$ ).

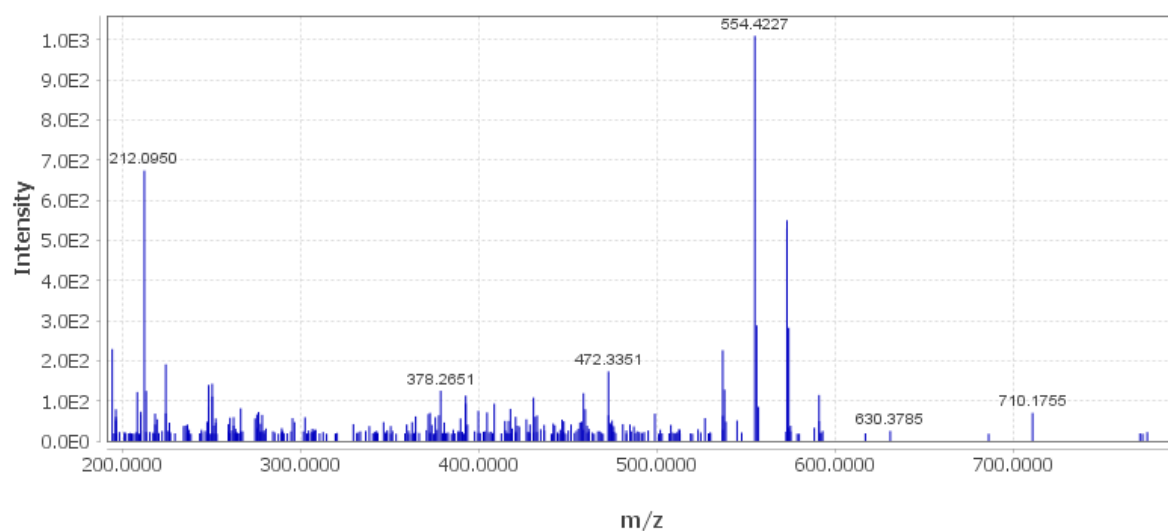

**Figure S11.** MS/MS spectrum of burnettramic acid A ( $C_{41}H_{72}NO_{12}$   $m/z$  770.5042  $[M+H]^+$ ).

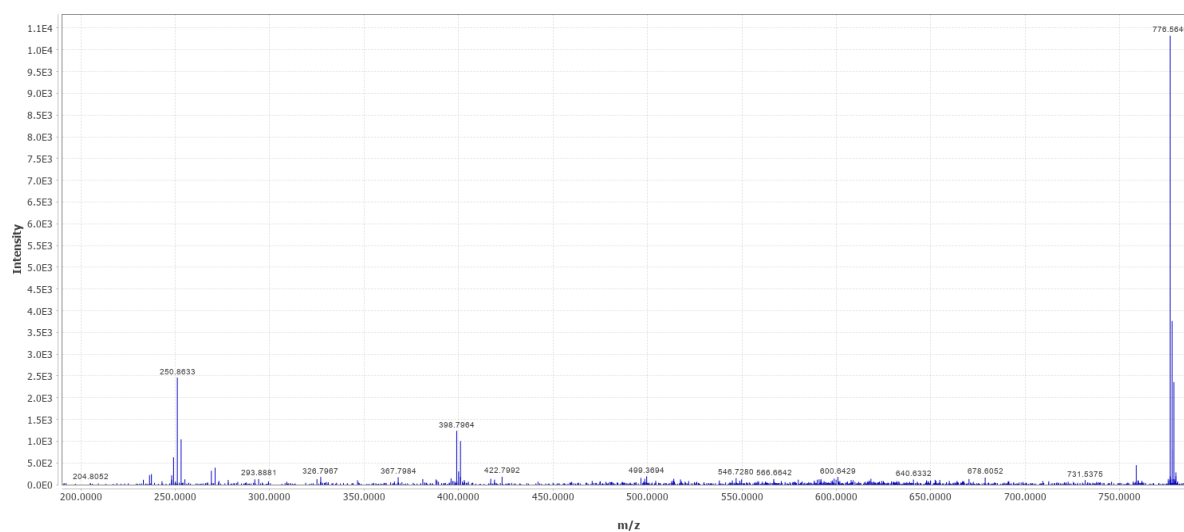

**Figure S12.** MS/MS spectrum of cerebroside derivative ( $C_{43}H_{79}NO_9$   $m/z$  776.5644  $[M+Na]^+$ ).



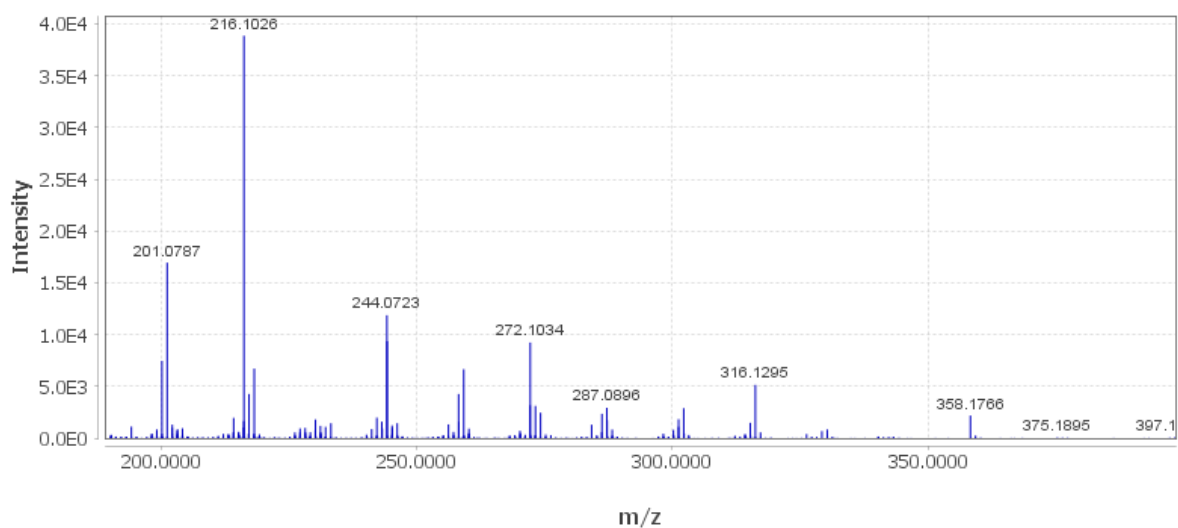

**Figure S13.** MS/MS spectrum of protubonine A ( $C_{19}H_{24}N_3O_4$   $m/z$  358.1768  $[M+H]^+$ ).

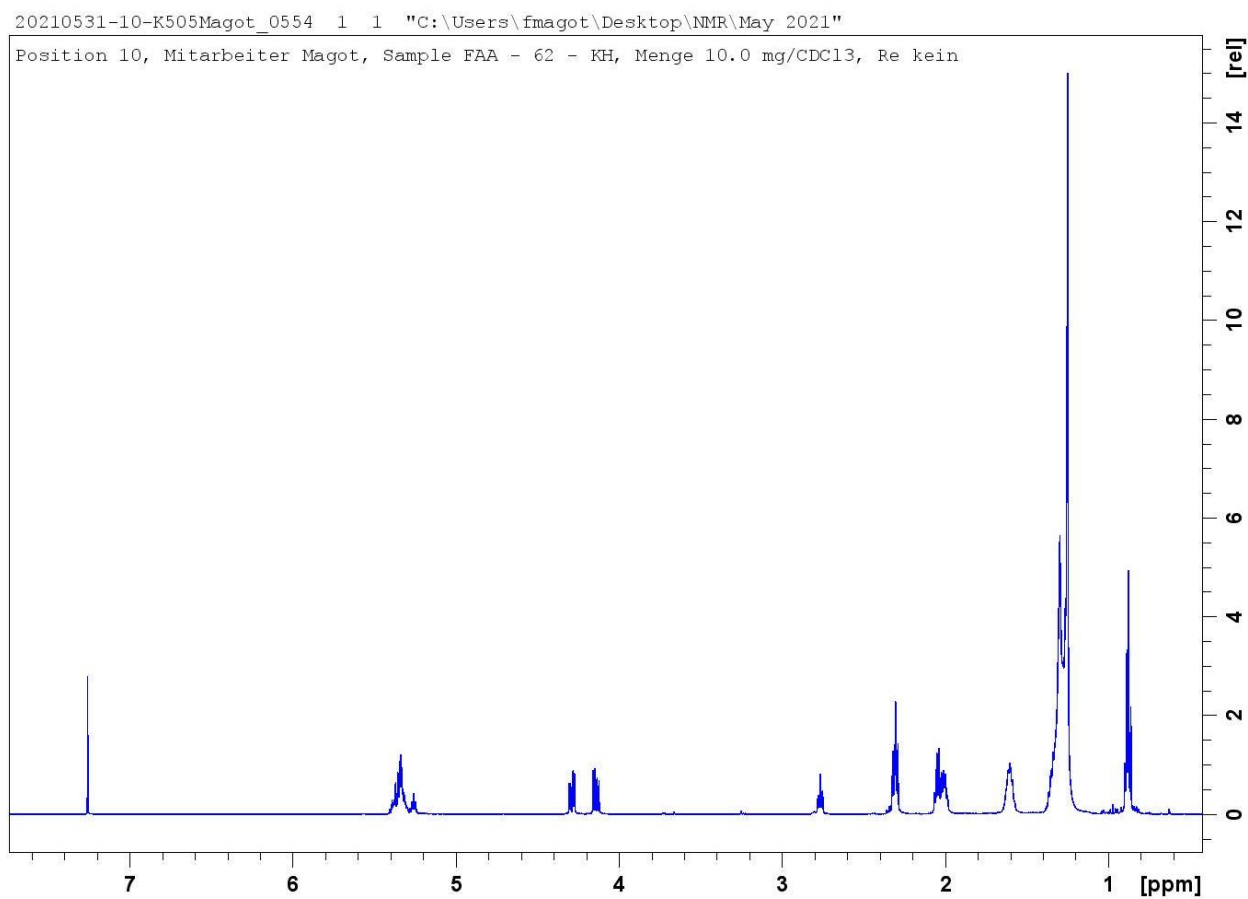

**Figure S14.**  $^1H$  NMR spectrum of the Kh subextract of *A. versicolor* PS108-62 ( $CDCl_3$ , 500 MHz).

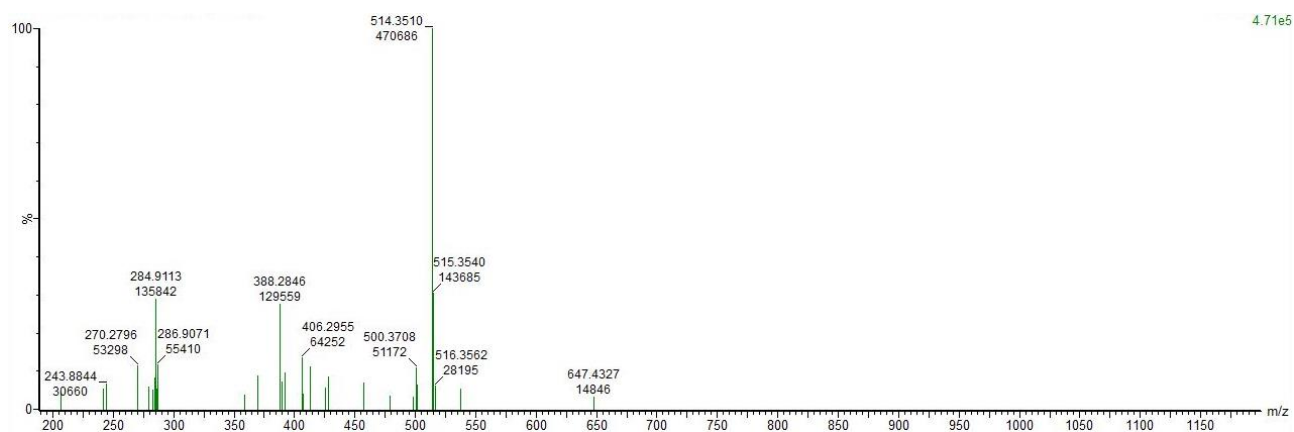

**Figure S15.** The HR-ESIMS spectrum of versicolide A (**1**).

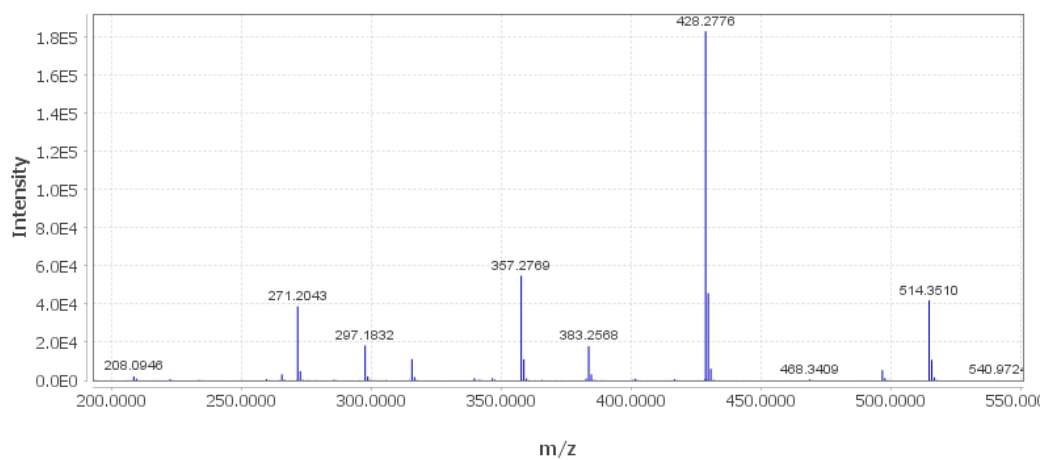

**Figure S16.** MS/MS spectrum of versicolide A (**1**) ( $C_{29}H_{49}NO_5$ ,  $m/z$  514.3510  $[M+Na]^+$ ).

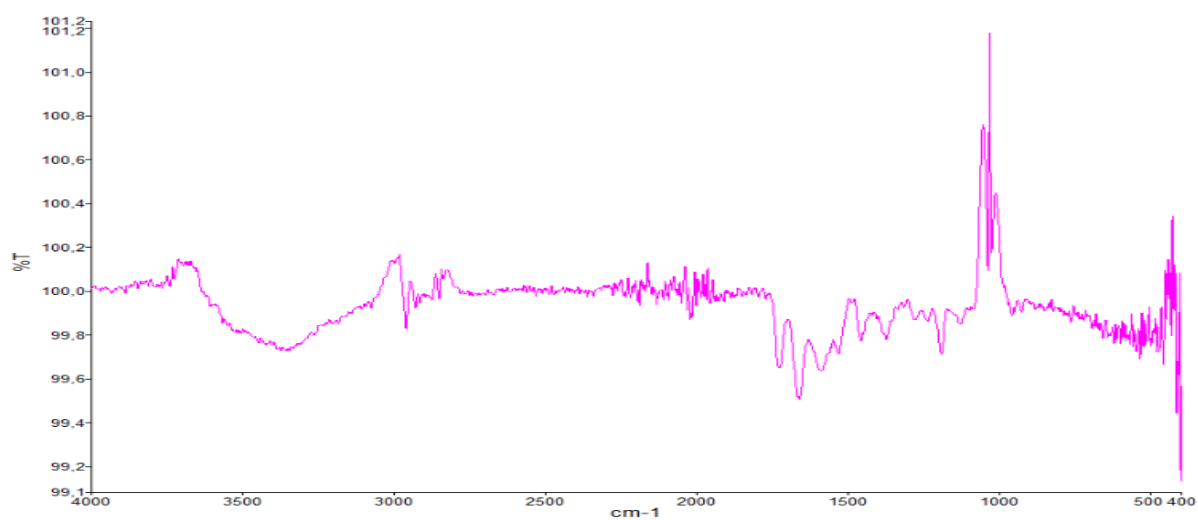

**Figure S17.** FT-IR spectrum of versicolide A (**1**).

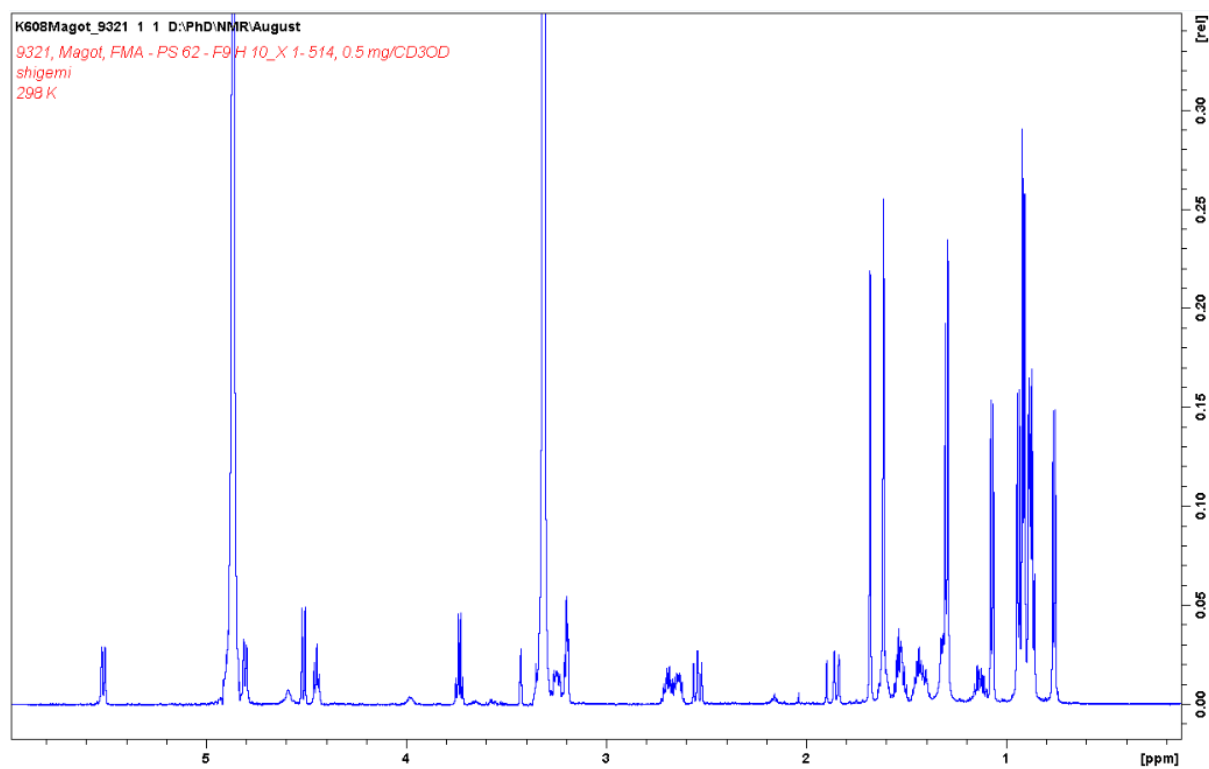

**Figure S18.**  $^1\text{H}$  NMR spectrum of versicolide A (**1**) (MeOD, 600 MHz).

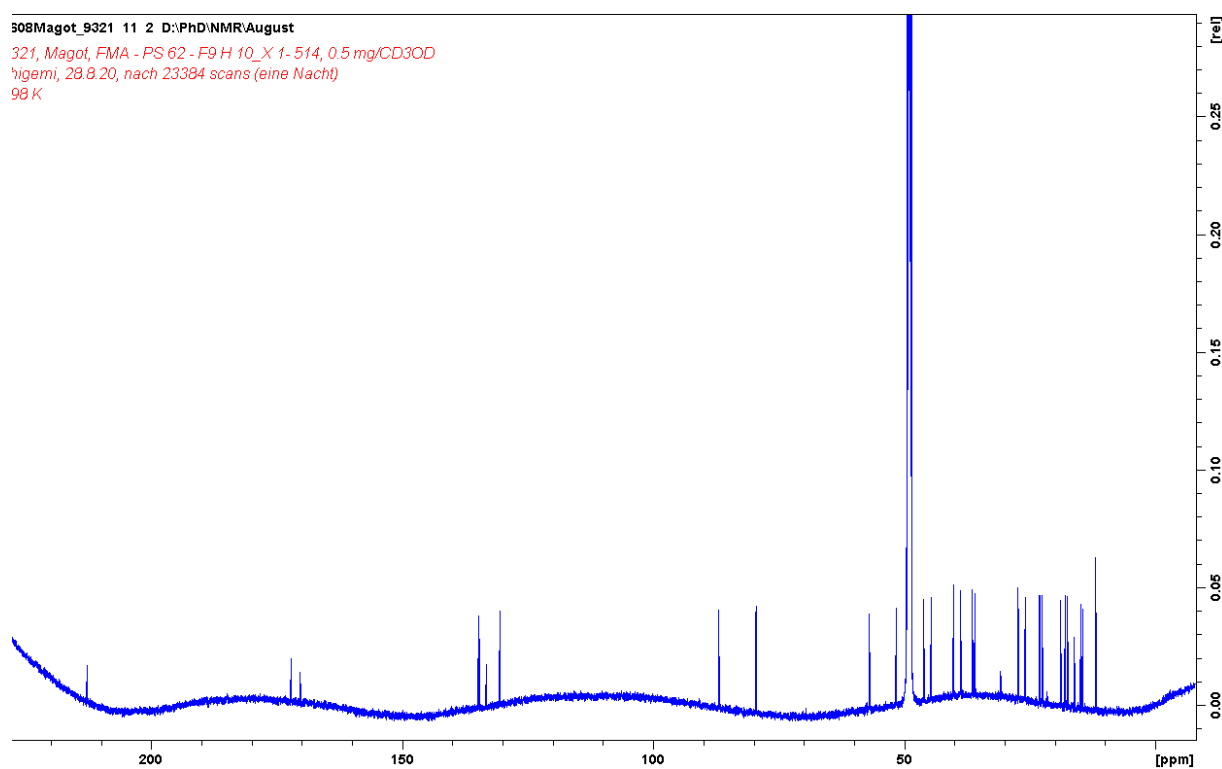

**Figure S19.**  $^{13}\text{C}$  NMR spectrum of versicolide A (**1**) (MeOD, 150 MHz).

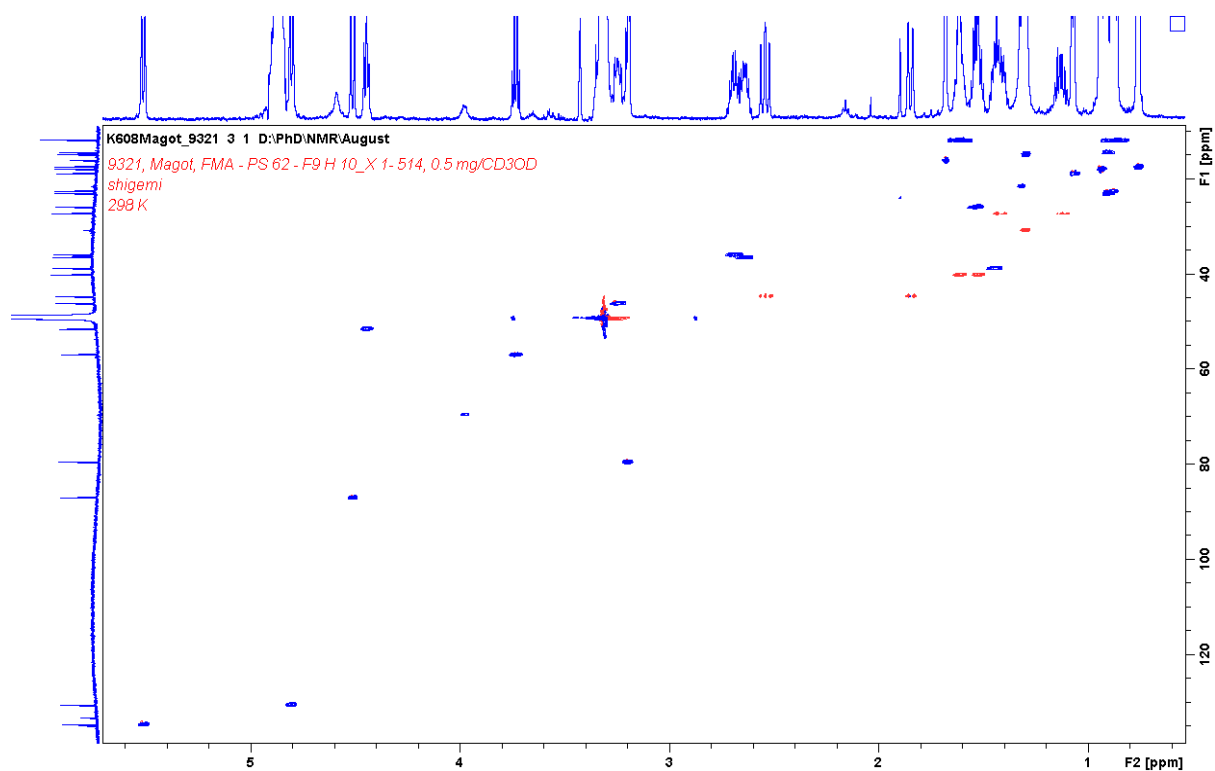

**Figure S20.** DEPT-HSQC spectrum of versicolide A (**1**) (MeOD, 600/150 MHz).

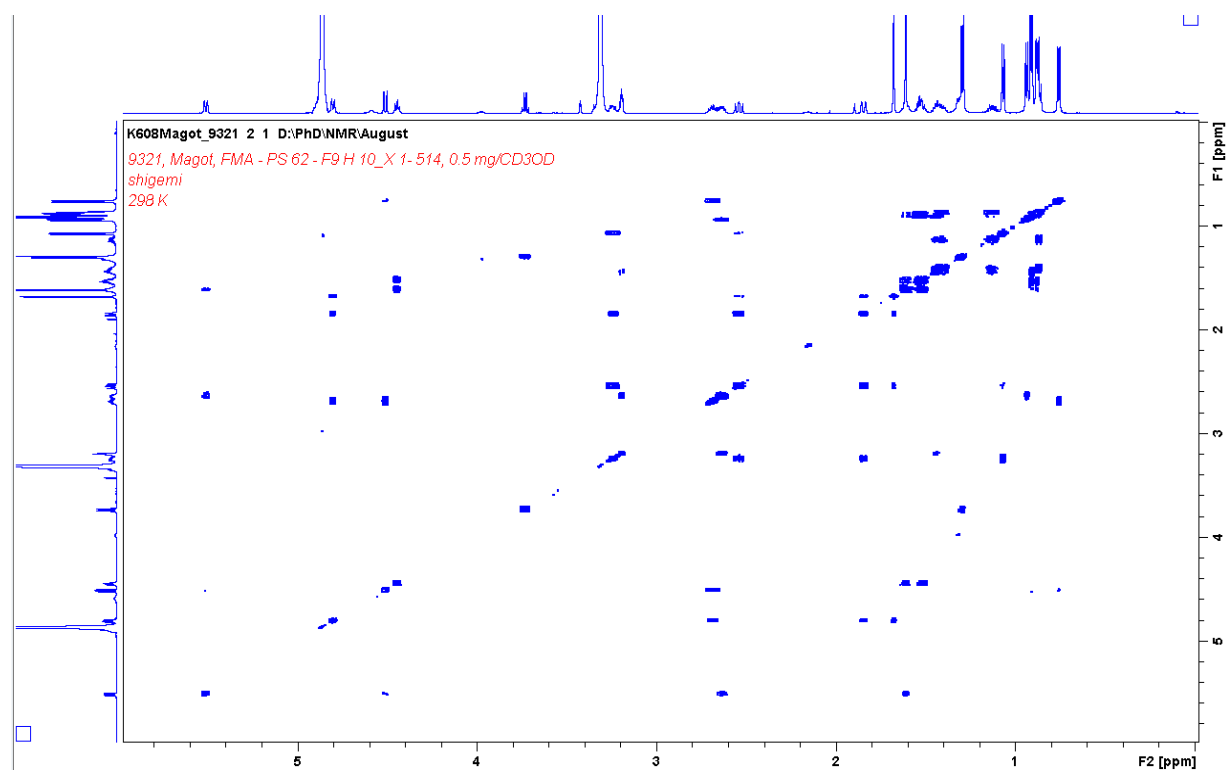

**Figure S21.**  $^1\text{H}$ - $^1\text{H}$  COSY NMR spectrum of versicolide A (**1**) (MeOD, 600 MHz).

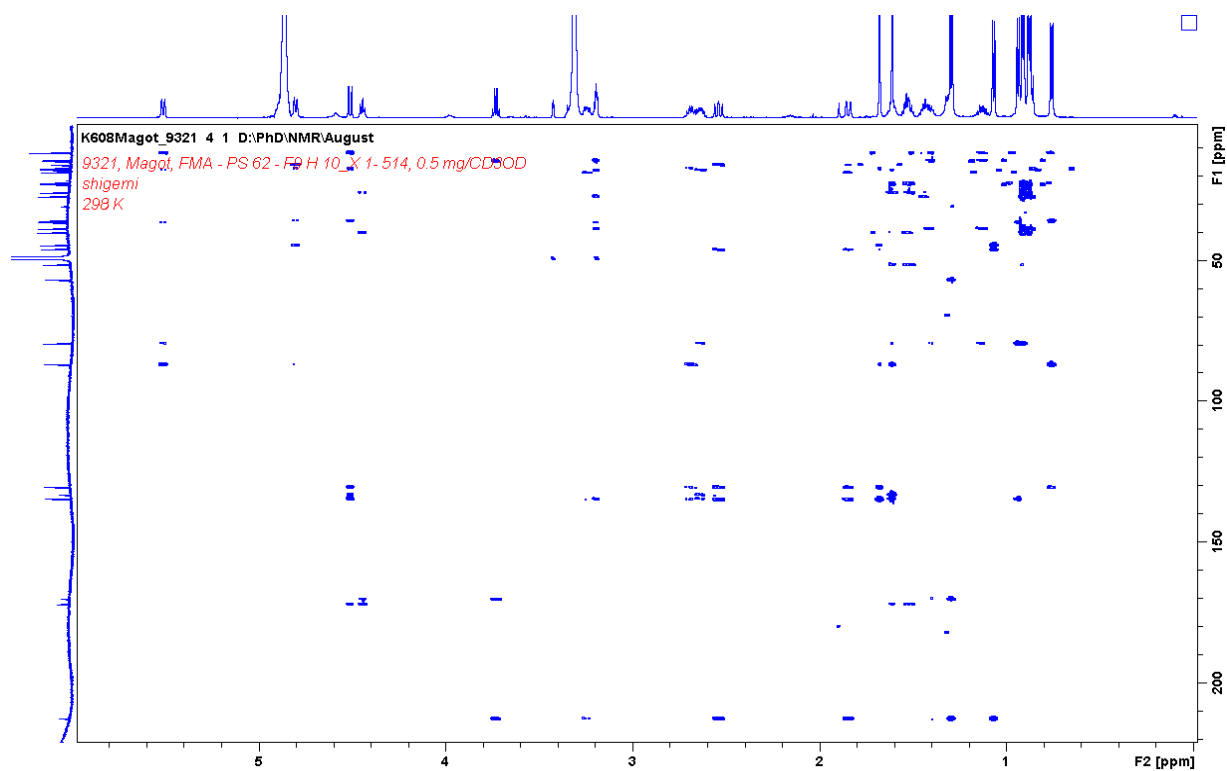

Figure S22. HMBC spectrum of versicolide A (**1**) (MeOD, 600/150 MHz).

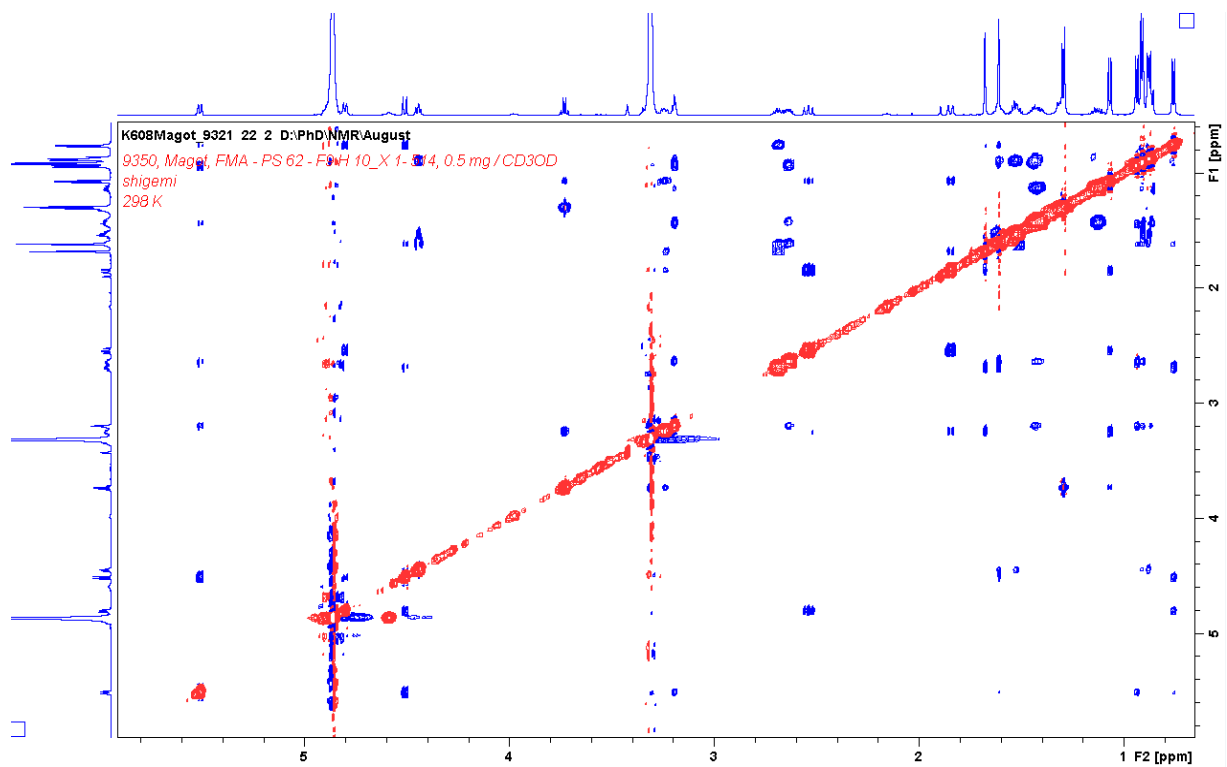

Figure S23. NOESY spectrum of versicolide A (**1**) (MeOD, 600MHz).

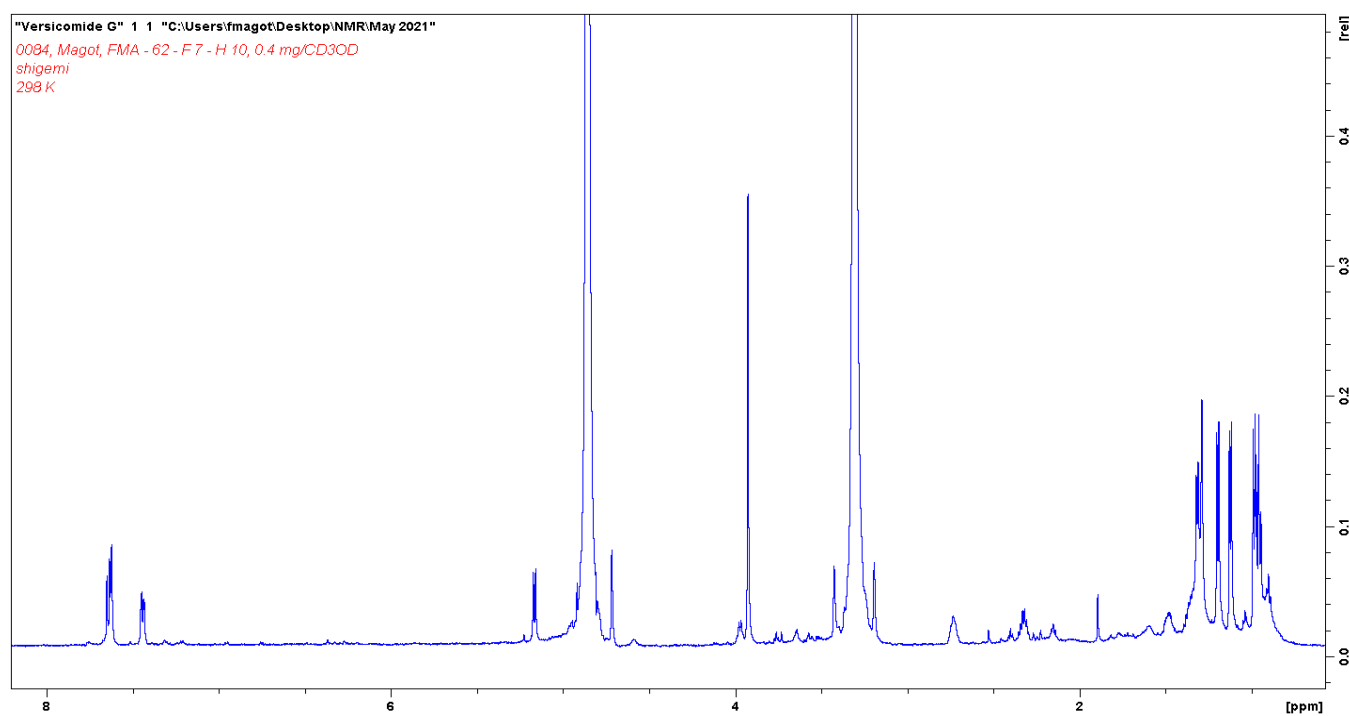

**Figure S24.**  $^1\text{H}$  NMR spectrum of (-)-isoversicomide A (3) (MeOD, 600 MHz).

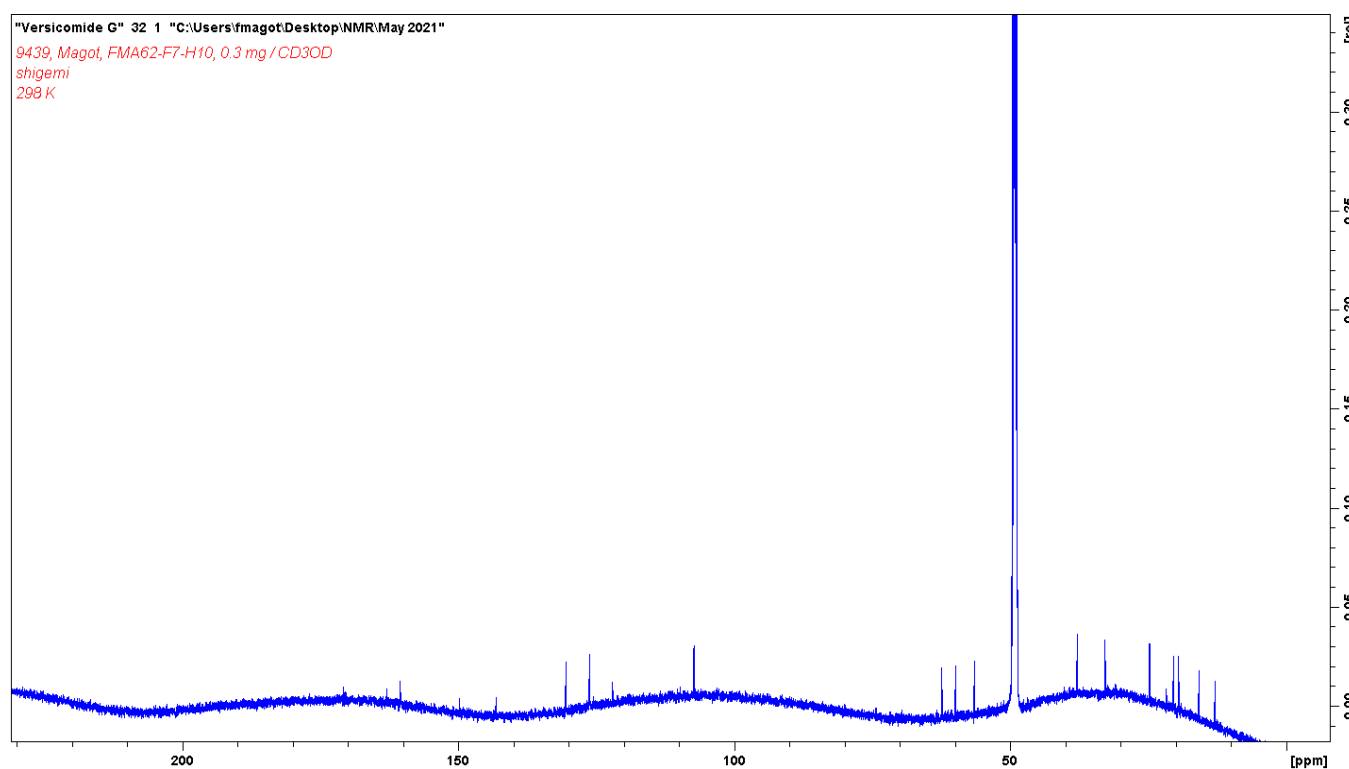

**Figure S25.**  $^{13}\text{C}$  NMR spectrum of (-)-isoversicomide A (3) (MeOD, 150 MHz).

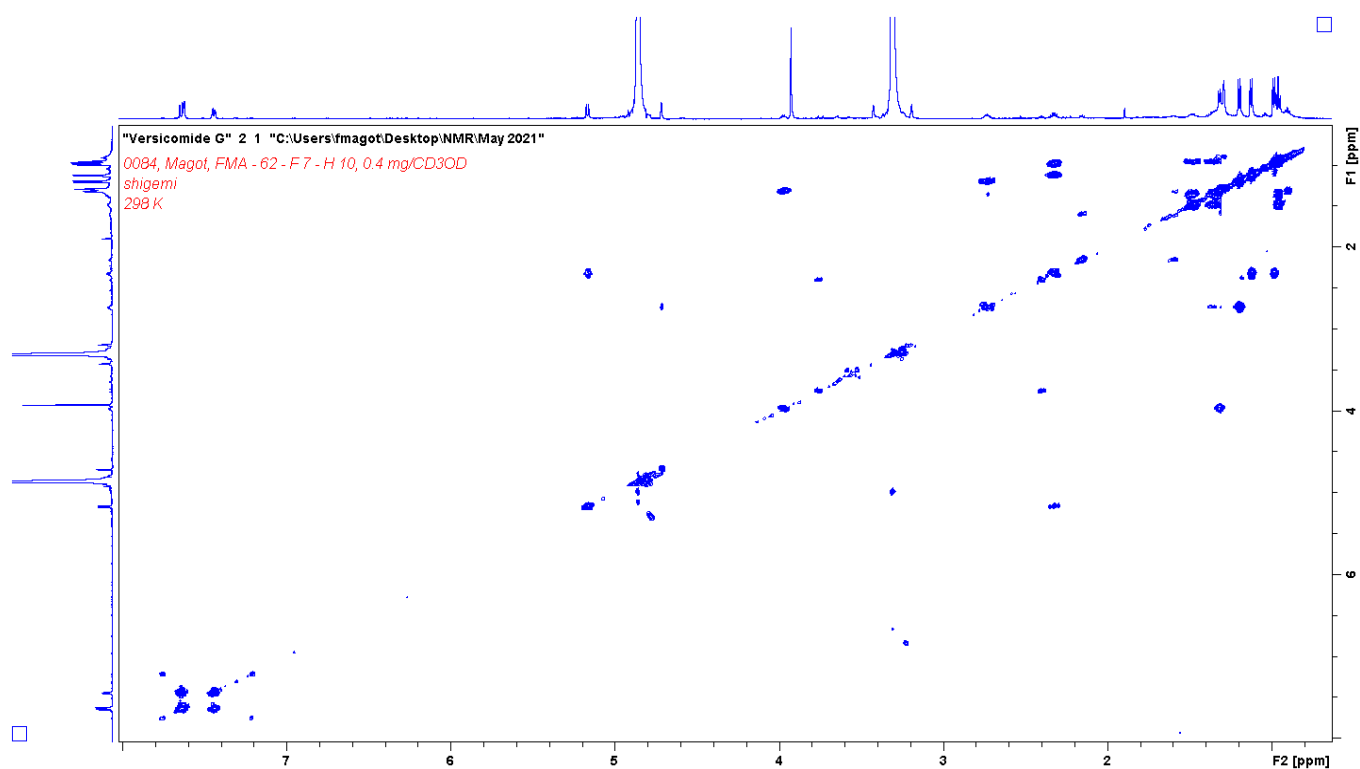

**Figure S26.** <sup>1</sup>H-<sup>1</sup>H COSY NMR spectrum of (-)-*isoversicomide* A (**3**) (MeOD, 600 MHz).

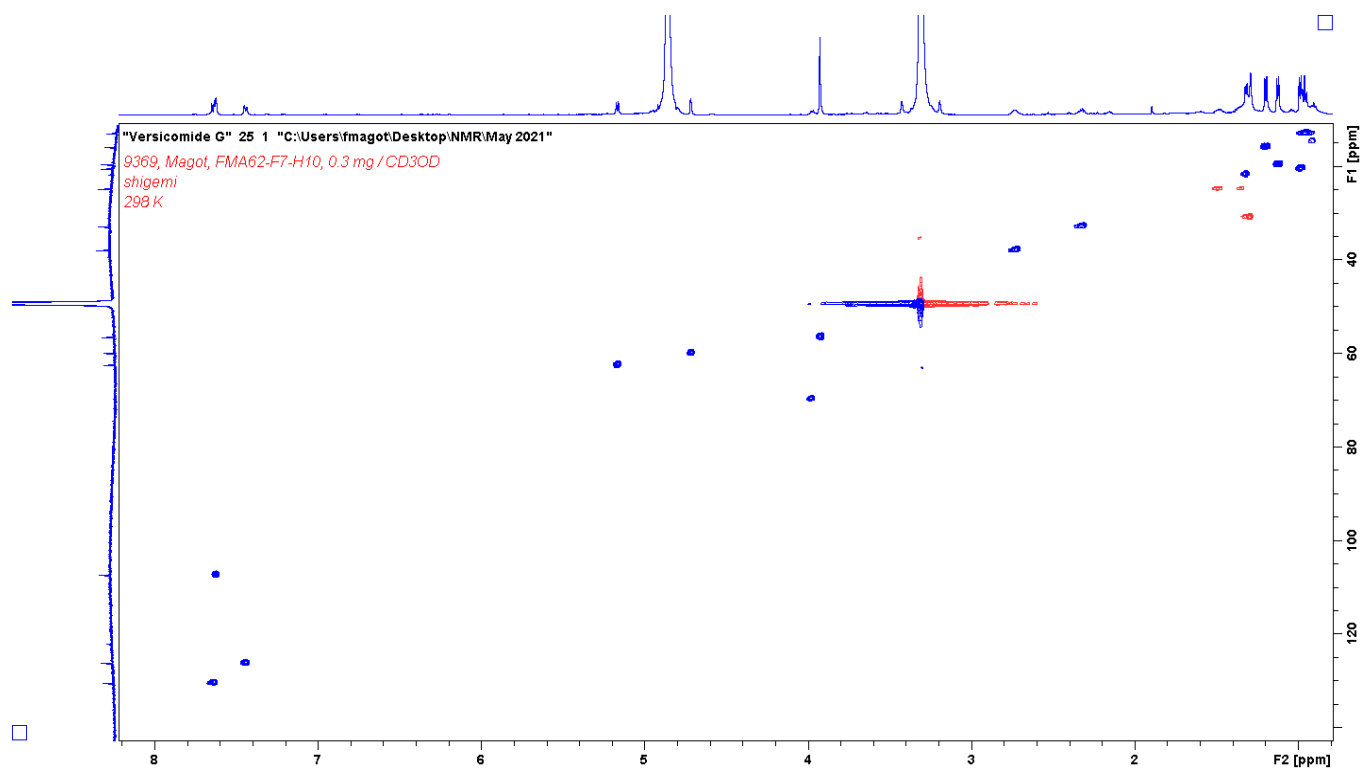

**Figure S27.** DEPT-HSQC spectrum of (-)-*isoversicomide* A (**3**) (MeOD, 600/150 MHz).



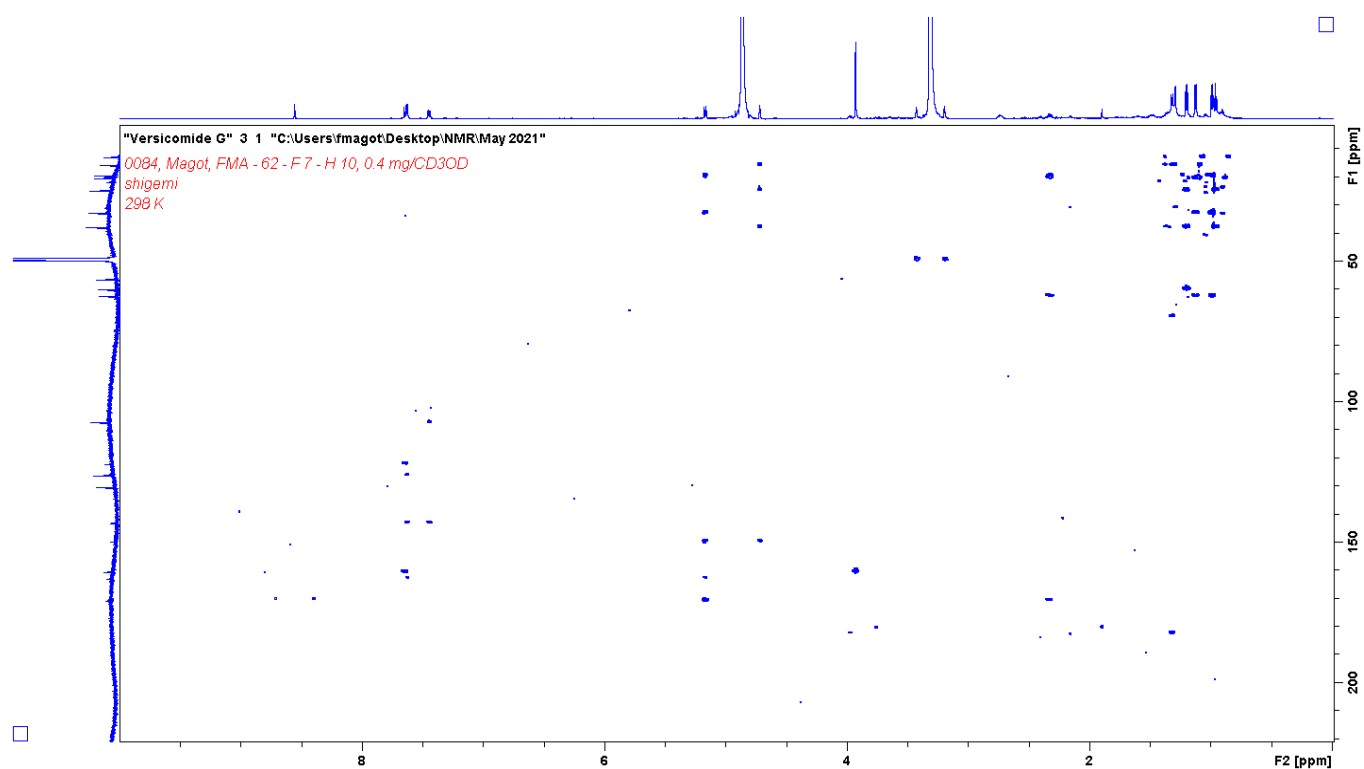

Figure S28. HMBC spectrum of (-)-isoversicomide A (3) (MeOD, 600/150 MHz).

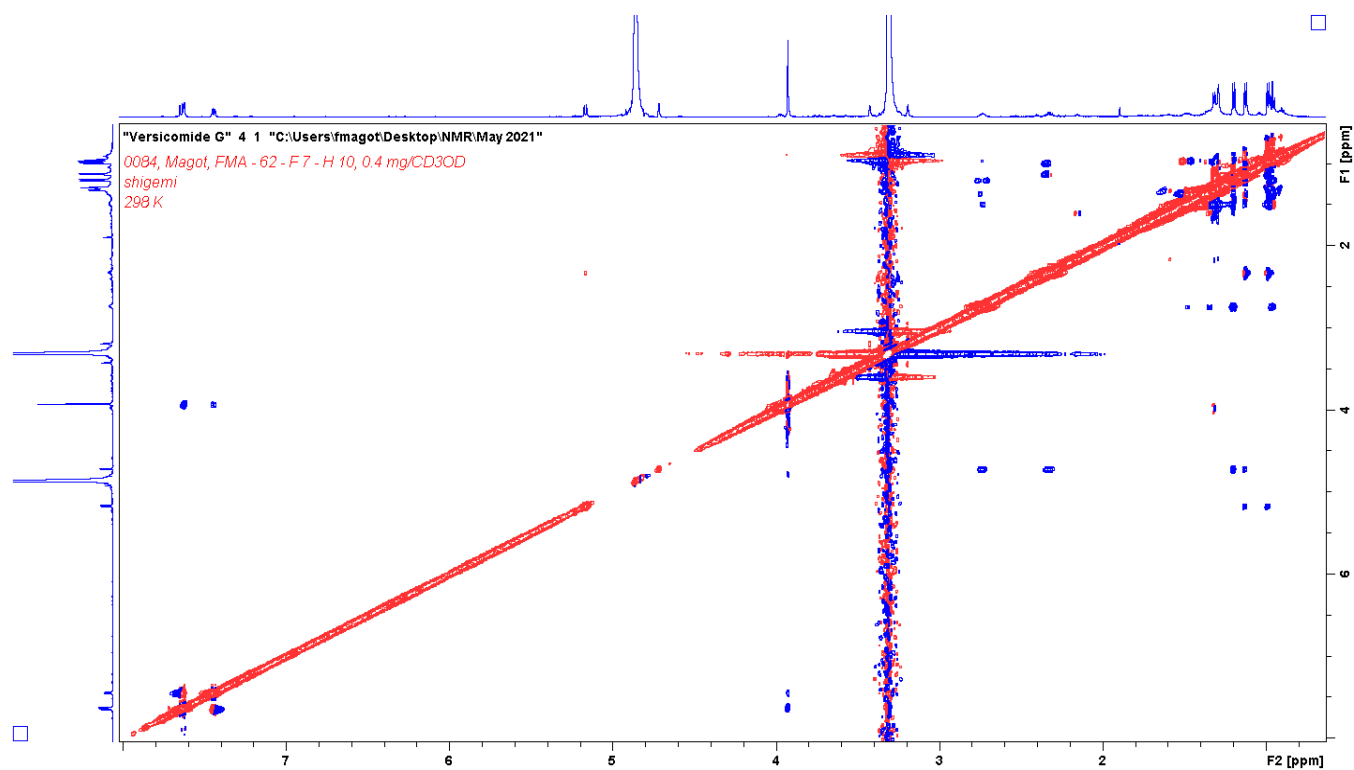

Figure S29. NOESY spectrum of (-)-isoversicomide A (3) (MeOD, 600 MHz).

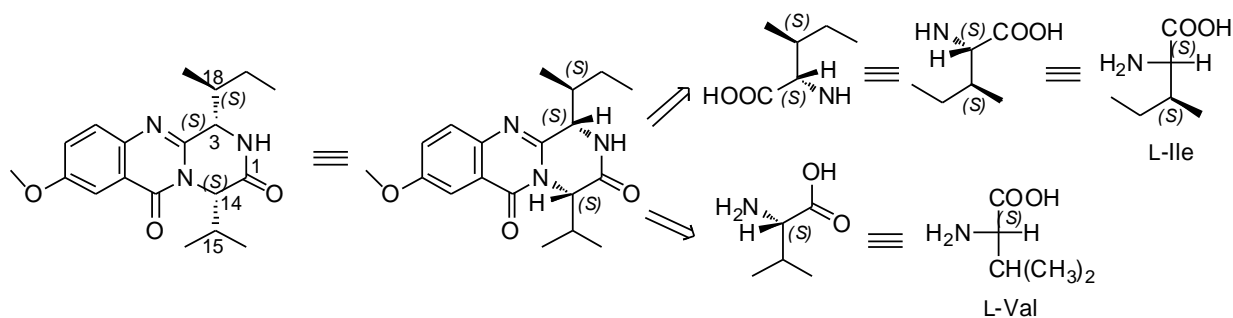

**Figure S30.** Detailed analysis of (+)-versicomide A drawn by Pan et al. [10] for its amino acid constituents

## References

1. Grangemard, I.; Bonmatin, J.-M.; Bernillon, J.; Das, B.C.; Peypoux, F. Lichensins G, a novel family of lipopeptide biosurfactants from *Bacillus licheniformis* IM 1307: Production, isolation and structural evaluation by NMR and mass spectrometry. *J. Antibiot. (Tokyo)*. **1999**, 52, 363–373.
2. Mohammed, Y.S.; Luckner M. The structure of cyclopenin and cyclopenol, metabolic products from *Penicillium cyclopium* Westling and *Penicillium viridicatum* Westling. *Tetrahedron Lett.* **1963**, 4, 1953–1958.
3. Lorenzo, P.; Álvarez, R.; De Lera, Á.R. Total synthesis and structural revision of (-)-protubonine A and (-)-protubonine B. *European J. Org. Chem.* **2014**, 2014, 2557–2564.
4. Lee, S.U.; Asami, Y.; Lee, D.; Jang, J.-H.; Ahn, J.S.; Oh, H. Protuboxepins A and B and protubonines A and B from the marine-derived fungus *Aspergillus* sp. SF-5044. *J. Nat. Prod.* **2011**, 74, 1284–1287.
5. Pan, C.; Shi, Y.; Chen, X.; Chen, C.-T.A.; Tao, X.; Wu, B. New compounds from a hydrothermal vent crab-associated fungus *Aspergillus versicolor* XZ-4. *Org. Biomol. Chem.* **2017**, 15, 1155–1163.
6. Li, J.; Chen, M.; Hao, X.; Li, S.; Li, F.; Yu, L.; Xiao, C.; Gan, M. Structural revision and absolute configuration of burnettramic acid A. *Org. Lett.* **2019**, 22, 98–101.
7. Li, H.; Gilchrist, C.L.M.; Lacey, H.J.; Crombie, A.; Vuong, D.; Pitt, J.I.; Lacey, E.; Chooi, Y.-H.; Piggott, A.M. Discovery and heterologous biosynthesis of the burnettramic acids: rare PKS-NRPS-derived bolaamphiphilic pyrrolizidinediones from an Australian fungus, *Aspergillus burnettii*. *Org. Lett.* **2019**, 21, 1287–1291.
8. Jiang, T.; Li, T.; Li, J.; Fu, H.-Z.; Pei, Y.-H.; Lin, W.-H. Cerebroside analogues from marine-derived fungus *Aspergillus flavipes*. *J. Asian Nat. Prod. Res.* **2004**, 6, 249–257.
9. Yang, G.; Sandjo, L.; Yun, K.; Leutou, A.S.; Kim, G.-D.; Choi, H.D.; Kang, J.S.; Hong, J.; Son, B.W. Flavusides A and B, antibacterial cerebrosides from the marine-derived fungus *Aspergillus flavus*. *Chem. Pharm. Bull.* **2011**, 59, 1174–1177.
10. Pan, C.; Shi, Y.; Chen, X.; Chen, C.-T.A.; Tao, X.; Wu, B. New compounds from a hydrothermal vent crab-associated fungus *Aspergillus versicolor* XZ-4. *Org. Biomol. Chem.* **2017**, 15, 1155–1163.
